# Supplementary material
Source: ML conference proceedings conference paper supplement (https://proceedings.neurips.cc/paper_files/paper/2023/hash/6b7676588c33d344485eeba1b5653ab1-Abstract.html)
Supplement: Supplementary file 1 [file 6b7676588c33d344485eeba1b5653ab1-Supplemental-Conference.pdf]

## A Preliminaries

Here we describe preliminaries necessary for Appendices B and C. This includes some basic properties of the Laplace–Beltrami operator on compact manifolds, partitions of unity subordinate to atlases, function spaces such as Hölder, Sobolev and Besov, and general Gaussian random elements on Banach spaces.

### A.1 Laplace–Beltrami Operator and Subordinate Partitions of Unity

Recall that  $\mathcal{M}$  denotes a compact Riemannian manifold. The Laplace–Beltrami operator  $\Delta$  on  $\mathcal{M}$  is self-adjoint and positive semi-definite [40, Theorem 2.4]. Let  $(L^2(\mathcal{M}), \langle \cdot, \cdot \rangle)$  denote the Hilbert space of square integrable functions on  $\mathcal{M}$  with respect to the standard Riemannian volume measure.<sup>2</sup>

By standard theory [10, 20], there exists an orthonormal basis  $\{f_j\}_{j=0}^\infty$  of  $L^2(\mathcal{M})$  consisting of the eigenfunctions of  $\Delta$ , such that  $\Delta f_j = \lambda_j f_j$  with  $\lambda_j \geq 0$ . We assume that the pairs  $(\lambda_j, f_j)$  are sorted such that  $0 = \lambda_0 \leq \lambda_1 \leq \lambda_2 \leq \dots$ . The growth of  $\lambda_j$  can be characterized as follows.

**Result 10** (Weyl’s Law). *There exists a constant  $C > 0$  such that for all  $j$  large enough*

$$C^{-1}j^{2/d} \leq \lambda_j \leq Cj^{2/d} \quad (16)$$

*Proof.* See Chavel [10], Chapter 1.  $\square$

Following De Vito et al. [13] and Große and Schneider [21] we fix a family  $\mathcal{T} = (\mathcal{U}_l, \phi_l, \chi_l)_{l=1}^L$  of  $\mathcal{M}$ , where  $L \in \mathbb{N}$ , the local coordinates  $\phi_l : \mathcal{U}_l \subset \mathcal{M} \rightarrow \mathcal{V}_l = \phi_l(\mathcal{U}_l) \subset \mathbb{R}^d$  are smooth diffeomorphisms, and the functions  $\chi_l$  form a partition of the unity subordinate to  $\{\mathcal{U}_l\}_{l=1}^L$ , i.e.  $\chi_l \in C^\infty(\mathcal{M})$ ,  $\text{supp}(\chi_l) \subset \mathcal{U}_l$ ,  $0 \leq \chi_l \leq 1$  and  $\sum_l \chi_l = 1$ .<sup>3</sup> For convenience and without loss of generality we assume that  $\mathcal{V}_l \subset [0, 1]^d$  and that it is of the form  $\mathcal{V}_l = (a_l, b_l)^d$ ,  $0 < a_l < b_l$ .<sup>4</sup> With this, we can start defining function spaces on  $\mathcal{M}$ .

### A.2 Hölder Spaces

We start with the manifold versions of the Euclidean Hölder spaces  $C^\gamma(\mathbb{R}^d)$ , whose definitions may be found, for instance, in Giné and Nickl [18] and Triebel [42].

**Definition 11** (Hölder spaces). *For all  $\gamma > 0$  we define the Hölder space  $C^\gamma(\mathcal{M})$  on the manifold  $\mathcal{M}$  to be the space of all  $f : \mathcal{M} \rightarrow \mathbb{R}$  satisfying*

$$\|f\|_{C^\gamma(\mathcal{M})} = \sum_{l=1}^L \|(\chi_l f) \circ \phi_l^{-1}\|_{C^\gamma(\mathbb{R}^d)} < \infty. \quad (17)$$

Since the charts  $\phi_l$  are smooth, Definition 11 can be easily seen to be independent of the chosen atlas, with equivalence of norms.

### A.3 Sobolev and Besov Spaces

We now introduce the manifold versions of the Sobolev and Besov spaces, whose definitions in the standard Euclidean case may be found, for instance, in Triebel [42]. For Sobolev spaces we use the Bessel-potential-based definition, following De Vito et al. [13].

**Definition 12** (Sobolev spaces). *For any  $s > 0$  we define the Sobolev space  $H^s(\mathcal{M})$  on the manifold  $\mathcal{M}$  as the Hilbert space of functions  $f \in L^2(\mathcal{M})$  such that  $\|f\|_{H^s(\mathcal{M})}^2 = \langle f, f \rangle_{H^s(\mathcal{M})} < \infty$  where*

$$\langle f, g \rangle_{H^s(\mathcal{M})} = \sum_{j=0}^\infty (1 + \lambda_j)^s \langle f, f_j \rangle_{L^2(\mathcal{M})} \langle g, f_j \rangle_{L^2(\mathcal{M})}. \quad (18)$$

<sup>2</sup>Strictly speaking,  $L^2(\mathcal{M})$  consists of equivalence classes with respect to the almost everywhere equality.

<sup>3</sup>We can choose  $L$  finite by compactness of  $\mathcal{M}$ .

<sup>4</sup>To see this, take  $\tilde{\phi}_l = \exp_{x_l}^{-1}$  and define  $\phi_l = T_l \circ \tilde{\phi}_l$  where  $T_l$  is an appropriate affine transformation. We can assume that  $\mathcal{V}_l = (a_l, b_l)^d$  by positivity of the injectivity radius at  $x_l$ .

**Remark 13.** It is easy to see that substituting  $(1 + \lambda_j)^s$  in Equation (18) with  $\beta(\alpha + \lambda_j)^s$  or with  $\alpha + \beta\lambda_j^s$  for any  $\alpha, \beta > 0$  results in the same set of functions and an equivalent norm. The former follows from Borovitskiy et al. [8], eq. (109). The latter follows from the Binomial Theorem.

For Besov spaces we follow Coulhon et al. [11] and Castillo et al. [9] and define them in terms of approximations by low-frequency functions. We fix a function  $\Phi \in C^\infty(\mathbb{R}_+, \mathbb{R}_+)$  such that  $K = \text{supp}(\Phi) \subset [0, 2]$  and  $\Phi(x) = 1$  for  $x \in [0, 1]$ . We also define functions  $\Phi_j$  by  $\Phi_j(x) = \Phi(2^{-j}x)$ .

Coulhon et al. [11], Corollary 3.6 shows that the operators  $\Phi_j(\sqrt{\Delta})$  defined by functional calculus—discussed, for instance, in Borovitskiy et al. [8]—are bounded in the space  $L^p(\mathcal{M})$  for all  $1 \leq p \leq \infty$ .<sup>5</sup> Moreover, it shows that  $f = \lim_{j \rightarrow \infty} \Phi_j(\sqrt{\Delta})f$  in  $L^p(\mathcal{M})$  for every  $f \in L^p(\mathcal{M})$ .  $\Phi_j(\sqrt{\Delta})f$  can intuitively be considered as a version of  $f$  filtered by a low-pass filter. More explicitly we can write

$$\Phi_j(\sqrt{\Delta})f = \sum_{j \geq 0} \Phi(\sqrt{\lambda_j}) \langle f_j, f \rangle f_j \quad (19)$$

which is indeed a filtered version of  $f$  as  $\Phi$  has compact support. The next definition introduces the Besov spaces  $B_{p,q}^s(\mathcal{M})$ , which are formulated in terms of quality-of-approximation by low-frequency functions.

**Definition 14** (Besov spaces). For any  $s > 0$  and  $1 \leq p, q \leq \infty$  we define the Besov space  $B_{p,q}^s(\mathcal{M})$  on the manifold  $\mathcal{M}$  as the space of functions  $f \in L^p(\mathcal{M})$  such that  $\|f\|_{B_{p,q}^s(\mathcal{M})} < \infty$  where

$$\|f\|_{B_{p,q}^s(\mathcal{M})} = \begin{cases} \|f\|_{L^p} + \left( \sum_{j \geq 0} \left( 2^{js} \|\Phi_j(\sqrt{\Delta})f - f\|_{L^p} \right)^q \right)^{1/q} & \text{if } q < +\infty \\ \|f\|_{L^p} + \sup_{j \geq 0} 2^{js} \|\Phi_j(\sqrt{\Delta})f - f\|_{L^p} & \text{if } q = +\infty. \end{cases} \quad (20)$$

It turns out that  $B_{2,2}^s(\mathcal{M})$  coincide with the Sobolev spaces  $H^s(\mathcal{M})$ , in the sense that they define the same set of functions and equivalent norms. The same is known for Besov and Sobolev spaces on  $\mathbb{R}^d$ —see for instance Giné and Nickl [18] section 4.3.6—and even on manifolds if one follows the construction of Triebel [42], pages 7.3–7.4 for Besov spaces. Since our definition is somewhat non-standard, we present the proof.

**Proposition 15.** For all  $s > 0$ ,  $H^s(\mathcal{M}) = B_{2,2}^s(\mathcal{M})$  as sets and there exist two constants  $C_1, C_2 > 0$  such that for all  $f \in H^s(\mathcal{M}) = B_{2,2}^s(\mathcal{M})$  we have

$$C_1 \|f\|_{H^s(\mathcal{M})} \leq \|f\|_{B_{2,2}^s(\mathcal{M})} \leq C_2 \|f\|_{H^s(\mathcal{M})}. \quad (21)$$

*Proof.* It is enough to prove (21), the rest will follow automatically. The main technical tools used in the proof are Result 10 and summation by parts. Let  $K = \text{supp}(\Phi)$ . For the upper bound, notice that

$$\|f\|_{B_{2,2}^s(\mathcal{M})}^2 = \sum_{j \geq 0} 2^{2js} \left\| \Phi_j(\sqrt{\Delta})f - f \right\|_{L^2(\mathcal{M})}^2 \quad (22)$$

$$= \sum_{j \geq 0} 2^{2js} \sum_{l: \sqrt{\lambda_l} \notin 2^j K} |\langle f_l, f \rangle_2|^2 \quad (23)$$

$$\leq \sum_{j \geq 0} 2^{2js} \sum_{l: \sqrt{\lambda_l} > 2^j} |\langle f_l, f \rangle_2|^2. \quad (24)$$

The last inequality results from the fact that  $[0, 1] \subset K$ . By Weyl's law Result 10 there exists a constant  $c > 0$  such that  $\lambda_l \leq cl^{2/d}$ . Without loss of generality we can assume that  $c = 2^{2r}$ ,  $r \in \mathbb{N}$ . Since  $\sqrt{\lambda_l} > 2^j$  implies  $l > 2^{d(j-r)}$  we have

$$\|f\|_{B_{2,2}^s(\mathcal{M})}^2 \leq \sum_{j \geq 0} 2^{2js} \sum_{l > 2^{d(j-r)}} |\langle f_l, f \rangle_2|^2 \quad (25)$$

$$= \sum_{j \leq r} 2^{2js} \sum_{l > 2^{d(j-r)}} |\langle f_l, f \rangle_2|^2 + \sum_{j > r} 2^{2js} \sum_{l > 2^{d(j-r)}} |\langle f_l, f \rangle_2|^2 \quad (26)$$

$$\leq r 2^{2rs} \|f\|_{L^2(\mathcal{M})}^2 + 2^{2rs} \sum_{j \geq 0} 2^{2js} \sum_{l > 2^{dj}} |\langle f_l, f \rangle_2|^2. \quad (27)$$

<sup>5</sup>The space  $L^p(\mathcal{M})$  is the Banach space of functions (or rather their equivalence classes) that are integrable when raised to the power  $p$ , see for instance Triebel [41] for details on these spaces.

563 Now let  $R_j = \sum_{l > 2^{dj}} |\langle f_l, f \rangle_2|^2$  and  $S_J = \sum_{j=0}^J 2^{2js} \leq \frac{2^{2s}}{2^{2s}-1} 2^{2Js}$ ,  $S_{-1} = 0$ . Write

$$\sum_{j \geq 0} 2^{2js} \sum_{l > 2^{dj}} |\langle f_l, f \rangle_2|^2 = \sum_{j \geq 0} (S_j - S_{j+1}) R_j \quad (28)$$

$$= \sum_{j \geq 0} S_j (R_j - R_{j+1}) - S_0 R_1 \quad (29)$$

$$\leq \sum_{j \geq 1} S_j (R_j - R_{j+1}) \quad (30)$$

$$= \sum_{j \geq 0} S_j \sum_{2^{dj} < l \leq 2^{(j+1)d}} |\langle f_l, f \rangle_2|^2 \quad (31)$$

$$\leq \frac{2^{2s}}{2^{2s}-1} \sum_{j \geq 0} 2^{2js} \sum_{2^{dj} < l \leq 2^{(j+1)d}} |\langle f_l, f \rangle_2|^2 \quad (32)$$

$$\leq \frac{2^{2s}}{2^{2s}-1} \sum_{j \geq 0} \sum_{2^{dj} < l \leq 2^{(j+1)d}} l^{2s/d} |\langle f_l, f \rangle_2|^2 \quad (33)$$

$$\leq \frac{c'^s 2^{2s}}{2^{2s}-1} \sum_{j \geq 0} \sum_{2^{dj} < l \leq 2^{(j+1)d}} \lambda_l^s |\langle f_l, f \rangle_2|^2 \quad (34)$$

$$= \frac{c'^s 2^{2s}}{2^{2s}-1} \sum_{l > 2^d} \lambda_l^s |\langle f_l, f \rangle_2|^2 \quad (35)$$

$$\leq \frac{c'^s 2^{2s}}{2^{2s}-1} \sum_{l \geq 0} \lambda_l^s |\langle f_l, f \rangle_2|^2. \quad (36)$$

564 Where we have used Result 10 to get existence of  $c'$  such that  $l^{2/d} \leq c' \lambda_l$ . This proves the upper  
 565 bound with  $C_2 = r 2^{2rs} \left(1 + \frac{c'^s 2^{2s}}{2^{2s}-1}\right)$ . The proof for the lower bound is similar.  $\square$

566 Proposition 15 provides a characterization of the Sobolev spaces  $H^s(\mathcal{M})$ . There is yet another charac-  
 567 terization of these spaces that will be useful later, in terms of charts. We present this characterization  
 568 as part of the following result.

569 **Theorem 16.** *On the Sobolev space  $H^s(\mathcal{M})$ , the following norms are equivalent:*

$$\|f\|_{H^s(\mathcal{M})} = \left( \sum_{j=0}^{\infty} (1 + \lambda_j)^s \langle f, f_j \rangle_{L^2(\mathcal{M})}^2 \right)^{1/2} \quad (37)$$

$$\|f\|_{B_{2,2}^s(\mathcal{M})} = \|f\|_{L^2} + \left( \sum_j \left( 2^{js} \|\Phi_j(\sqrt{\Delta})f - f\|_{L^2(\mathcal{M})} \right)^2 \right)^{1/2} \quad (38)$$

$$\|f\|_{H_T^s(\mathcal{M})} = \left( \sum_{l=1}^L \|(\chi_l f) \circ \phi_l^{-1}\|_{H^s(\mathbb{R}^d)}^2 \right)^{1/2} \quad (39)$$

570 *Proof.* The equivalence between  $\|\cdot\|_{H^s(\mathcal{M})}$  and  $\|f\|_{B_{2,2}^s(\mathcal{M})}$  is given by Proposition 15. The equiva-  
 571 lence between  $\|\cdot\|_{H^s(\mathcal{M})}$  and  $\|f\|_{H_T^s(\mathcal{M})}$  is proved in De Vito et al. [13].  $\square$

#### 572 A.4 Gaussian Random Elements

573 Here we recall the definition of a Gaussian process as a Banach-space-valued random variable,  
 574 following for instance van Zanten and van der Vaart [49].

575 **Definition 17** (Gaussian random element). *Let  $(\mathbb{B}, \|\cdot\|_{\mathbb{B}})$  be a Banach space, and  $f$  be a Borel  
 576 random variable with values in  $\mathbb{B}$  almost surely. We say that  $f$  is a Gaussian random element if  $b^*(f)$   
 577 is a univariate Gaussian random variable for every bounded linear functional  $b^*$  on  $\mathbb{B}$ .*

Random variables of this kind are also sometimes called *Gaussian in the sense of duality*. One should think of a Gaussian random element as a generalization of a Gaussian process, but which is better-behaved from a function-analytic point of view and in particular does not require the process to be an actual function—as opposed to, for instance, a distribution. Many connections between the usual Gaussian processes and Gaussian random elements exist, see Lifshits [27], Ghosal and van der Vaart [17], Appendix I, van der Vaart and van Zanten [46] for details. The following observation about Gaussian random elements will be useful later.

**Lemma 18.** *A Gaussian process  $f$  on the manifold  $\mathcal{M}$  with almost surely continuous sample paths is a Gaussian random element in the Banach space  $(\mathcal{C}(\mathcal{M}), \|\cdot\|_\infty)$  of continuous functions on  $\mathcal{M}$ .*

*Proof.* Since  $\mathcal{C}(\mathcal{M})$  is separable, this follows from Lemma I.6 in Ghosal and van der Vaart [17].  $\square$

## B Technical Lemmas

This section contains the lemmas used in Appendix C. In this section the expression  $a \lesssim b$  means  $a \leq Cb$  for some constant  $C > 0$  whose value is irrelevant for our claims. We start by an upper bound on the metric entropy of Sobolev balls on  $\mathcal{M}$  with respect to the uniform norm.

**Lemma 19** (Entropy of Sobolev balls). *For all  $s > 0$  let  $H_1^s = \{f \in H^s(\mathcal{M}) : \|f\|_{H^s(\mathcal{M})} \leq 1\}$ . Define the  $\varepsilon$ -covering number of  $H_1^s$  with respect to the norm  $\|\cdot\|_{L^\infty(\mathcal{M})}$  by*

$$N(\varepsilon, H_1^s, \|\cdot\|_{L^\infty(\mathcal{M})}) = \arg \min_{J \in \mathbb{N}} \left\{ \exists h_1, \dots, h_J \in H_1^s : H_1^s \subset \bigcup_{j=1}^J B(h_j, \varepsilon, \|\cdot\|_{L^\infty(\mathcal{M})}) \right\} \quad (40)$$

where  $B(h_j, \varepsilon, \|\cdot\|_{L^\infty(\mathcal{M})})$  stands for the  $\|\cdot\|_{L^\infty(\mathcal{M})}$  ball with center  $h_j$  and radius  $\varepsilon$ .

For any  $\nu > 0$ , there exist  $C, \varepsilon_0 > 0$  such that for every  $\varepsilon \leq \varepsilon_0$

$$\ln N(\varepsilon, H_1^{\nu+d/2}, \|\cdot\|_{L^\infty(\mathcal{M})}) \leq C\varepsilon^{-\frac{d}{\nu+d/2}}, \quad (41)$$

where the left-hand side of the inequality above, as a function of  $\varepsilon$ , is called the METRIC ENTROPY of the Sobolev ball  $H_1^{\nu+d/2}$  with respect to the uniform norm  $\|\cdot\|_{L^\infty(\mathcal{M})}$ .

*Proof.* Using the charts we will reduce the problem to the entropy of the unit ball of the Sobolev space  $H^{\nu+d/2}([0, 1]^d)$  for which the upper bound is known. Take  $f \in H_1^{\nu+d/2}$  and look for an approximation of  $f$  by  $\tilde{f}$  of the form

$$\tilde{f} = \sum_{l=1}^L \chi_l(h_l \circ \phi_l) \quad (42)$$

for some functions  $h_l : \mathcal{V}_l \rightarrow \mathbb{R}$  where  $\mathcal{V}_l \subseteq \mathbb{R}^d$ . We have

$$\|f - \tilde{f}\|_{L^\infty(\mathcal{M})} = \left\| \sum_{l=1}^L \chi_l(h_l \circ \phi_l - f) \right\|_{L^\infty(\mathcal{M})} \leq \sum_{l=1}^L \|\chi_l(h_l \circ \phi_l - f)\|_{L^\infty(\mathcal{U}_l)} \quad (43)$$

$$\leq \sum_{l=1}^L \|h_l \circ \phi_l - f\|_{L^\infty(\mathcal{U}_l)} \leq \sum_{l=1}^L \|h_l - f \circ \phi_l^{-1}\|_{L^\infty(\mathcal{V}_l)} \quad (44)$$

$$\leq L \max_{1 \leq l \leq L} \|h_l - f \circ \phi_l^{-1}\|_{L^\infty([0, 1]^d)}. \quad (45)$$

This means that to approximate  $f$  by  $\tilde{f}$  uniformly on  $\mathcal{M}$  we need to choose the functions  $h_l$  that approximate  $f \circ \phi_l^{-1}$  well with respect to the uniform norm on  $[0, 1]^d$ .

Next, we show that the functions  $f \circ \phi_l^{-1}$  are contained in an Euclidean Sobolev ball of radius  $R$ , with  $R$  depending only on  $\nu$  and the atlas. We use Große and Schneider [21], Lemma 2.1<sup>6</sup> to get

<sup>6</sup>Importantly, also the remark just above Große and Schneider [21], Lemma 2.1, that allows us to consider Besov spaces  $B_{2,2}^s$  coinciding with the Sobolev spaces  $H^s$  instead of the Besov spaces  $B_{2,\infty}^s$ .

606 from the second line to the third, and  $R$  is the constant hidden behind the notation  $\lesssim$  in the last line.

$$\|f \circ \phi_l^{-1}\|_{H^s([0,1]^d)} = \left\| \sum_{l'=1}^L (\chi_{l'} f) \circ \phi_l^{-1} \right\|_{H^s([0,1]^d)} \leq \sum_{l'=1}^L \|(\chi_{l'} f) \circ \phi_l^{-1}\|_{H^s([0,1]^d)} \quad (46)$$

$$= \sum_{l'=1}^L \|(\chi_{l'} f) \circ \phi_{l'}^{-1} \circ \phi_{l'} \circ \phi_l^{-1}\|_{H^s([0,1]^d)} \quad (47)$$

$$\lesssim \sum_{l'=1}^L \|(\chi_{l'} f) \circ \phi_{l'}^{-1}\|_{H^s([0,1]^d)} \lesssim \|f\|_{H^s(\mathcal{M})}. \quad (48)$$

607 Without loss of generality we assume  $R = 1$ . By the Euclidean counterpart [18, Theorem 4.3.36] of  
608 the result we are proving, we have

$$\ln N\left(\varepsilon, H_1^{\nu+d/2}([0,1]^d), \|\cdot\|_{L^\infty([0,1]^d)}\right) \lesssim \varepsilon^{-\frac{d}{\nu+d/2}}. \quad (49)$$

609 Let  $h_1, \dots, h_J \in H_1^{\nu+d/2}$  be such that  $H_1^{\nu+d/2}([0,1]^d) \subset \cup_{j=1}^J B(h_j, \varepsilon/L, \|\cdot\|_{L^\infty([0,1]^d)})$ . Then for  
610 any  $f \in H_1^{\nu+d/2}$  there exists a sequence  $\{j_l\}_{l=1}^L \subseteq \{1, \dots, J\}$  such that

$$\left\| f - \sum_{l=1}^L \chi_l(h_{j_l} \circ \phi_l) \right\|_{L^\infty(\mathcal{M})} < L \frac{\varepsilon}{L} = \varepsilon. \quad (50)$$

611 This shows that  $N(\varepsilon, H_1^s, \|\cdot\|_{L^\infty(\mathcal{M})}) \leq LJ$ , where  $L$  is just the number of charts, proving the claim.

612 □

613 For the related *diffusion spaces* [13], the RKHS corresponding to the heat (diffusion) kernels, Castillo  
614 et al. [9] uses the results of Coulhon et al. [11] to bound the entropy in terms of a wavelet frame  
615 instead of relying on charts. We believe this alternative proof scheme should work in our case as well.  
616 However, we could not, to the best of our effort, get a tight enough bound for the Sobolev spaces by  
617 directly using the results of Coulhon et al. [11] and therefore we chose to rely on charts instead.

618 The next two theorems will be useful to characterize the RKHS of the extrinsic Matérn process on  $\mathcal{M}$ .  
619 We start by a lemma relating the RKHS of the restriction of a Gaussian process to the original one.

620 **Lemma 20.** Assume that  $k$  is a kernel on  $\mathbb{R}^d$ ,  $f \sim \text{GP}(0, k)$  with almost surely continuous sample  
621 paths and  $\tilde{\mathbb{H}}$  is the RKHS of  $k$ . If  $\mathcal{M} \subseteq \mathbb{R}^d$  is a submanifold, then the RKHS  $\mathbb{H}$  corresponding to the  
622 restricted process  $f|_{\mathcal{M}}$  is the set of all restrictions  $g|_{\mathcal{M}}$  of functions  $g \in \tilde{\mathbb{H}}$  equipped with the norm

$$\|h\|_{\mathbb{H}} = \inf_{g \in \tilde{\mathbb{H}}, g|_{\mathcal{M}} = h} \|g\|_{\tilde{\mathbb{H}}}. \quad (51)$$

623 Moreover there always exists an element  $g \in \tilde{\mathbb{H}}$  such that  $g|_{\mathcal{M}} = f$  and  $\|g\|_{\tilde{\mathbb{H}}} = \|f\|_{\mathbb{H}}$ .

624 *Proof.* Lemma 5.1 in Yang and Dunson [53]. □

625 The last result will be used to characterize the RKHS of the extrinsic Matérn Gaussian processes  
626 using trace and extension operators. The second ingredient for this is the following.

627 **Theorem 21.** If  $s > \frac{D-d}{2}$  then the restriction operator extends to a bounded linear map  $\text{Tr}_s : H^s(\mathbb{R}^D) \rightarrow H^{s-\frac{D-d}{2}}(\mathcal{M})$ . Moreover, for every  $u > 0$  there exists a bounded right inverse  
628  $\text{Ex}_u : H^u(\mathcal{M}) \rightarrow H^{u+\frac{D-d}{2}}(\mathbb{R}^D)$  such that  $\text{Tr}_{u+\frac{D-d}{2}} \circ \text{Ex}_u = I_{H^u(\mathcal{M})}$ .  
629

630 *Proof.* Theorem 4.10 in Große and Schneider [21]. □

631 The last two results allow us to characterize the RKHS of the extrinsic Matérn process on  $\mathcal{M}$ .

632 **Proposition 22.** The RKHS  $\mathbb{H}$  of a restricted extrinsic Matérn process  $f$  with smoothness parameter  
633  $\nu$  on  $\mathcal{M}$  is norm equivalent to the Sobolev space  $H^{\nu+d/2}(\mathcal{M})$ .

634 *Proof.* Using Lemma 20, the RKHS  $\mathbb{H}$  can be characterized as the set of functions  $f : \mathcal{M} \rightarrow \mathbb{R}$  that  
 635 are the restrictions of some  $g \in \widetilde{\mathbb{H}}$ , where  $\widetilde{\mathbb{H}}$  is the RKHS of the ambient Matérn process  $\tilde{f}$ , with

$$\|f\|_{\mathbb{H}} = \inf_{g \in \widetilde{\mathbb{H}}, g|_{\mathcal{M}}=f} \|g\|_{\widetilde{\mathbb{H}}}. \quad (52)$$

636 Since  $\widetilde{\mathbb{H}}$  is norm-equivalent to the Sobolev space<sup>7</sup>  $H^{\nu+D/2}(\mathbb{R}^D)$  (see the appendix in Borovitskiy  
 637 et al. [8]), by the trace and extension theorem Theorem 21 for every  $f \in \mathbb{H}$

$$\|f\|_{\mathbb{H}} \lesssim \|\text{Ex}(f)\|_{H^{\nu+D/2}(\mathbb{R}^D)} \lesssim \|f\|_{H^{\nu+D/2-\frac{D-d}{2}}(\mathcal{M})} = \|f\|_{H^{\nu+d/2}(\mathcal{M})}. \quad (53)$$

638 Similarly, for every  $g \in \widetilde{\mathbb{H}}$  with  $g|_{\mathcal{M}} = f$  we have

$$\|f\|_{H^{\nu+d/2}(\mathcal{M})} = \|g|_{\mathcal{M}}\|_{H^{\nu+d/2}(\mathcal{M})} \lesssim \|g\|_{H^{\nu+D/2}(\mathbb{R}^D)} \lesssim \|g\|_{\widetilde{\mathbb{H}}}. \quad (54)$$

639 Hence, taking the infimum we obtain

$$\|f\|_{H^{\nu+d/2}(\mathcal{M})} \lesssim \inf_{g \in \widetilde{\mathbb{H}}, g|_{\mathcal{M}}=f} \|g\|_{\widetilde{\mathbb{H}}} = \|f\|_{\mathbb{H}}. \quad (55)$$

640 □

641 The next lemma describes the RKHS of the intrinsic Matérn processes, including truncated variants.  
 642 This result is easy to obtain since we have defined them in terms of the Karhunen–Loève expansions.

643 **Lemma 23.** *Denote by  $\mathbb{H}_J$  the RKHS of the intrinsic Matérn Gaussian process with smoothness*  
 644 *parameter  $\nu$  truncated at the level  $J \in \mathbb{N} \cup \{\infty\}$ . Recall that  $\{f_j\}_{j=1}^{\infty}$  denotes the orthonormal basis*  
 645 *of the Laplace–Beltrami eigenfunctions. The space  $\mathbb{H}_J$  is norm equivalent—with constants depending*  
 646 *only on  $\nu, \kappa$  and  $\sigma_f^2$ —to the set of functions  $f = \sum_{j=1}^J b_j f_j$ ,  $b_j \in \mathbb{R}$  with the inner product*

$$\left\langle \sum_{j=1}^J b_j f_j, \sum_{j=1}^J b'_j f_j \right\rangle_{\mathbb{H}_J} = \sum_{j=1}^J (1 + \lambda_j)^{\nu+d/2} b_j b'_j. \quad (56)$$

647 In particular,  $\mathbb{H}_J \subset H^{\nu+d/2}(\mathcal{M})$  for all  $J$ , and for every  $h \in \mathbb{H}_J$  we have  $\|h\|_{\mathbb{H}_J} = \|h\|_{H^{\nu+d/2}(\mathcal{M})}$ .

648 *Proof.* By direct computation, the covariance  $k$  of the (truncated) intrinsic Gaussian process is

$$k(x, x') = \frac{\sigma_f^2}{C_{\nu, \kappa}} \sum_{j=1}^J \left( \frac{2\nu}{\kappa^2} + \lambda_j \right)^{-(\nu+d/2)} f_j(x) f_j(x'). \quad (57)$$

649 Hence the kernel operator  $K : L^2(\mathcal{M}) \rightarrow L^2(\mathcal{M})$  defined by  $(Kf)(x) = \int_{\mathcal{M}} k(x, x') f(x') dx'$   
 650 is diagonal in the basis  $\{f_j\}_{j=1}^J$ , with  $Kf_j = \frac{\sigma_f^2}{C_{\nu, \kappa}} \left( \frac{2\nu}{\kappa^2} + \lambda_j \right)^{-(\nu+d/2)} f_j$ . Then Theorem 4.2 in  
 651 Kanagawa et al. [23] implies that  $\mathbb{H}_J$  consists of functions of form  $f = \sum_{j=1}^J a_j f_j$  satisfying

$$\|f\|_{\mathbb{H}_J}^2 = \frac{\sigma_f^2}{C_{\nu, \kappa}} \sum_{j=1}^J \left( \frac{2\nu}{\kappa^2} + \lambda_j \right)^{\nu+d/2} |a_j|^2 < \infty. \quad (58)$$

652 Using the simple inequality  $\min\left(\frac{2\nu}{\kappa^2}, 1\right) \leq \frac{\frac{2\nu}{\kappa^2} + \lambda}{1 + \lambda} \leq \max\left(\frac{2\nu}{\kappa^2}, 1\right)$ , we find that this space is norm  
 653 equivalent to the space  $H_J^{\nu+d/2}$  of functions  $f = \sum_{j=1}^J a_j f_j$  satisfying

$$\|f\|_{H_J^{\nu+d/2}}^2 = \sum_{j=1}^J (1 + \lambda_j)^{\nu+d/2} |a_j|^2 < \infty. \quad (59)$$

654 The comparison constants  $\sqrt{\frac{\sigma_f^2}{C_{\nu, \kappa}} \min(1, \frac{2\nu}{\kappa^2})}$  and  $\sqrt{\frac{\sigma_f^2}{C_{\nu, \kappa}} \max(1, \frac{2\nu}{\kappa^2})}$  only depend on  $\nu, \kappa, \sigma_f^2$ . □

<sup>7</sup>Actually, this norm-equivalence is the only property of the Gaussian process we use in the proofs. Any other Gaussian process satisfying this would also work, not only the Matérn processes from Borovitskiy et al. [8]. This is of potential interest since other Euclidean kernels, such as Wendland kernels [51], are known to possess RKHS' which are norm-equivalent to those of the Matérn kernel.

655 Having characterized the RKHS of the processes, we now prove that they can be seen as Gaussian  
 656 random elements in the Banach space  $(\mathcal{C}(\mathcal{M}), \|\cdot\|_\infty)$  of continuous functions on  $\mathcal{M}$ .

657 **Corollary 24.** *The intrinsic Matérn Gaussian processes of Definition 4, their truncated versions*  
 658 *as in Theorem 6 as well as the extrinsic Matérn Gaussian processes of Definition 7 are Gaussian*  
 659 *random elements in  $(\mathcal{C}(\mathcal{M}), \|\cdot\|_\infty)$ .*

660 *Proof.* By Lemma 18 it suffices to show that the processes have almost surely continuous sample  
 661 paths. The Euclidean Matérn Gaussian processes have continuous sample paths, implying the same  
 662 for their restrictions, the extrinsic Matérn Gaussian processes on  $\mathcal{M}$ . For the intrinsic Matérn process,  
 663 we use lemma Lemma 27 below.  $\square$

664 The last corollary allows us to use the same proof scheme as van der Vaart and van Zanten [47]  
 665 through the control of the so-called *concentration functions* that we shall define later. It is also  
 666 important that we work with Gaussian random elements in  $\mathcal{C}(\mathcal{M})$ —and not only with the classical  
 667 notion of Gaussian process—as the concentration functions are defined using the *Gaussian random*  
 668 *element RKHS* defined in van Zanten and van der Vaart [49], which can be different from the classical  
 669 RKHS. Fortunately, when the process is a Gaussian random element in  $\mathcal{C}(\mathcal{M})$ , van Zanten and  
 670 van der Vaart [49], Theorem 2.1 implies that the two notions of RKHS coincide.

671 In order to extend convergence rates results with respect to the empirical  $L^2$ -norm to convergence  
 672 rates with respect to the full  $L^2$ -norm, we need to show regularity properties of the prior process'  
 673 sample paths. Kolmogorov's continuity criterion is a standard tool in probability theory to show that  
 674 a given stochastic process has a Hölder continuous version: we re-prove it here because we will need  
 675 a form of the result which gives explicit control of the Hölder norms, which is not usually included in  
 676 the statement of the theorem.

677 In the following, if  $h$  is a random variable under the probability measure  $\Pi$ , we define

$$\Pi[h] = \int h \Pi(dh) \quad (60)$$

678 for the expectation of  $h$  with respect to  $\Pi$ , assuming integrability.

679 **Lemma 25** (Kolmogorov's continuity criterion). *If  $g \sim \Pi$  is a zero mean Gaussian process on  $[0, 1]^d$*

$$\Pi[|g(x) - g(y)|^2] \leq C \|x - y\|^{2\rho} \quad (61)$$

680 *for some  $0 < \rho \leq 1$  and  $C > 0$ , then there exists a version of  $g$  with samples paths in  $C^\alpha([0, 1]^d)$*   
 681 *for every  $0 < \alpha < \rho$ . Moreover for every  $\alpha < \rho$  this version satisfies  $\Pi[\|g\|_{C^\alpha([0, 1]^d)}^2] \leq C'$  where*  
 682  *$C' < +\infty$  depends only on  $C, \rho$  and  $\alpha$ .*

683 *Proof.* Take  $x, y \in [0, 1]$ ,  $M > 0$  and  $q \in \mathbb{N}$ . Since the random variable  $g(x) - g(y)$  is Gaussian we  
 684 have

$$\Pi[|g(x) - g(y)|^{2q}] = \frac{(2q)!}{2^q q!} \Pi[|g(x) - g(y)|^2]^q \leq C_q \|x - y\|^{2\rho q} \quad (62)$$

685 where  $C_q := C^q \frac{(2q)!}{2^q q!}$ . We consider the  $2q$ -th power for a reason that will become clear later in the  
 686 proof. Therefore by Markov's inequality for every  $x, y \in [0, 1]^d$  we have

$$\Pi[|g(x) - g(y)| > u] \leq C_q u^{-2q} \|x - y\|^{2\rho q} \quad (63)$$

687 Now take  $X = \cup_{k \geq 1} X_k$ ,  $X_k = 2^{-k} \mathbb{Z}^d \cap [0, 1]^d$ . Then the previous inequality applied to any  
 688  $x, y \in X_k$  adjacent, where we see  $X_k$  as a graph where two vertices are connected if they differ by at  
 689 most one coordinate, and  $u = M 2^{-k\alpha}$  implies

$$\Pi[|g(x) - g(y)| > M 2^{-k\alpha}] \leq C_q M^{-2q} 2^{-2kq(\rho - \alpha)} \quad (64)$$

690 Summing over  $k \geq 1$  and adjacent points in  $X$ —and there are at most  $C2^{kd}$  of them where  $C > 0$  is  
 691 an absolute constant—gives us for  $q > \frac{d}{2(\rho-\alpha)}$ , where we may take  $q = \frac{d}{(\rho-\alpha)}$ , that

$$\Pi[\exists x, y \in X, x, y \text{ adjacent}, |g(x) - g(y)| > M\|x - y\|^\alpha] \quad (65)$$

$$\leq \sum_{k \geq 1} \sum_{x, y \in X \text{ adjacent}} \Pi[|g(x) - g(y)| > M2^{-k\alpha}] \quad (66)$$

$$\leq C \sum_{k \geq 1} 2^{kd} C_q M^{-2q} 2^{-2kq(\rho-\alpha)} = \frac{CC_q}{2^{2q(\rho-\alpha)-d}-1} M^{-2q}. \quad (67)$$

692 In particular for all  $q > \max\left(1, \frac{d}{2(\rho-\alpha)}\right)$  we have

$$\Pi \left[ \left( \sup_{x, y \in X \text{ adjacent}} \frac{|g(x) - g(y)|}{\|x - y\|^\alpha} \right)^2 \right] \leq 2 + 2 \int_1^\infty M \Pi \left[ \sup_{x, y \in X \text{ adjacent}} \frac{|g(x) - g(y)|}{\|x - y\|^\alpha} > M \right] dM \quad (68)$$

$$\leq C_{C, \alpha, \rho} \quad (69)$$

693 for some constant  $C_{C, \alpha, \rho} < +\infty$ . In particular  $K = \sup_{x, y \in X \text{ adjacent}} \frac{|g(x) - g(y)|}{\|x - y\|^\alpha}$  is finite almost  
 694 surely. Since  $X$  is dense in  $[0, 1]^d$  and  $g$  is almost surely uniformly continuous on  $X$ ,  $g$  admits a  
 695 unique continuous extension to  $[0, 1]^d$  on an almost sure event  $\mathcal{A}$ . Let us define

$$\forall x \in [0, 1]^d, \bar{g}(x) = \begin{cases} \lim_{y \rightarrow x, y \in X} g(y) & \text{on } \mathcal{A} \\ 0 & \text{otherwise} \end{cases} \quad (70)$$

696 For any  $x, y \in [0, 1]^d$  and  $x_n \rightarrow x, y_n \rightarrow y, x_n, y_n \in X$  we have

$$|\bar{g}(x) - \bar{g}(y)| \leq \liminf_{n \rightarrow \infty} |\bar{g}(x) - \bar{g}(x_n)| + |\bar{g}(x_n) - \bar{g}(y_n)| + |\bar{g}(y_n) - \bar{g}(y)| \quad (71)$$

$$\leq \liminf_{n \rightarrow \infty} |\bar{g}(x) - \bar{g}(x_n)| + K\|x_n - y_n\|^\alpha + |\bar{g}(y_n) - \bar{g}(y)| \quad (72)$$

$$= K\|x - y\|^\alpha \quad (73)$$

697 Hence  $\bar{g}$  is  $\alpha$ -Hölder continuous on  $[0, 1]^d$  with the same constant  $K$  and, using  $(a + b)^2 \leq 2(a^2 + b^2)$   
 698 that is valid for every  $a, b > 0$ , we have

$$\Pi \left[ \|\bar{g}\|_{C^\alpha([0, 1]^d)}^2 \right] \leq 2\Pi \left[ \left( \sup_{x \in X} g(x)^2 \right) \right] + 2\Pi \left[ \left( \sup_{x, y \in X \text{ adjacent}} \frac{|g(x) - g(y)|}{\|x - y\|^\alpha} \right)^2 \right] \quad (74)$$

$$\leq 2\Pi \left[ (|g(0)| + K)^2 \right] + 2\Pi \left[ \left( \sup_{x, y \in X \text{ adjacent}} \frac{|g(x) - g(y)|}{\|x - y\|^\alpha} \right)^2 \right] \quad (75)$$

$$\leq 4\Pi[g(0)^2 + K^2] + 2\Pi \left[ \left( \sup_{x, y \in X \text{ adjacent}} \frac{|g(x) - g(y)|}{\|x - y\|^\alpha} \right)^2 \right] \quad (76)$$

$$\leq C_{C, \alpha, \rho} < +\infty \quad (77)$$

699 where for the last inequality we have also used  $g(0) \in L^2$ . Moreover  $\bar{g}$  is a version of  $g$ : for all  
 700  $x \in [0, 1]^d$  we have by definition  $\lim_{y \in X, y \rightarrow x} g(y) = \bar{g}(x)$  almost surely, and  $\Pi[|g(x) - \bar{g}(x)|^2] \leq$   
 701  $C\|x - y\|^{2\rho} \rightarrow 0$  as  $y \rightarrow x, y \in X$ , hence the uniqueness of the limit in probability implies that for  
 702 all  $x \in [0, 1]^d$   $\bar{g}(x) = g(x)$  almost surely, ie that  $\bar{g}$  is a version of  $g(x)$ . Finally, if  $\alpha < \alpha' < \rho$ , then  
 703 since the two versions corresponding to  $\alpha$  and  $\alpha'$  are continuous, they must be indistinguishable.  $\square$

704 **Remark 26.** We see in the last proof that we can replace  $\Pi[\|g\|_{C^\alpha([0, 1]^d)}^2] \leq C_{C, \alpha, \rho}$  in the statement  
 705 by  $\Pi[\|g\|_{C^\alpha([0, 1]^d)}^r] \leq C'_{C, \alpha, \rho, r}$  for any  $r > 0$ , even though we will only use  $r = 2$  in the following.

706 The next lemma applies our version of Kolmogorov's criterion, Lemma 25, to the intrinsic Matérn  
 707 processes on  $\mathcal{M}$  by considering charts. Another idea would be to use Driscoll's Theorem—given  
 708 in Kanagawa et al. [23], Theorem 4.9—and the Sobolev embedding theorem—De Vito et al. [13],  
 709 Theorem 4—but that would only give us that the sample paths are almost surely in  $\mathcal{C}^\gamma(\mathcal{M})$  for every  
 710  $0 < \gamma < \nu - d/2, \gamma \notin \mathbb{N}$ , whereas here we improve the range of index to  $\gamma < \nu$ . As we will see  
 711 in Appendix C, we need to ensure that this property holds somewhat uniformly with respect to the  
 712 truncation parameter, which is why we tracked the constants in our proof of Kolmogorov's criterion.  
 713 As we will see, the main difficulty in the proof of the next result will be to tackle the case of regularity  
 714 strictly larger than 1.

715 **Lemma 27.** *Let  $f \sim \Pi_n$  be an intrinsic Matérn process with smoothness parameter  $\nu > 0$  truncated*  
 716 *at  $J_n \in \mathbb{N} \cup \{\infty\}$ . Then for every  $\gamma < \nu$  we have*

$$\sup_n \Pi_n \left[ \|f\|_{\mathcal{C}^\gamma(\mathcal{M})}^2 \right] < \infty. \quad (78)$$

717 *Proof.* We start by the case  $\nu \leq 1$ . Take  $1 \leq l \leq L$  and define  $h_l = (\chi_l f) \circ \phi_l^{-1}$ . Then  $h_l$  is a  
 718 Gaussian process with covariance kernel given by

$$\forall x, y \in \mathcal{V}_l, \tilde{K}(x, y) = \chi_l \circ \phi_l^{-1}(x) K(x, y) \chi_l \circ \phi_l^{-1}(y) \quad (79)$$

719 where  $K(x, y) = \Pi_n[(f \circ \phi_l^{-1}(x))(f \circ \phi_l^{-1}(y))]$  is the covariance kernel of  $f$ . This has an RKHS  
 720 that we denote  $\tilde{\mathbb{H}}$ . The goal is to apply Lemma 25 to  $h_l$ . For all  $x, y \in \mathcal{V}_l$ , where we recall that we  
 721 can assume that  $\mathcal{V}_l = (a_l, b_l), 0 < a_l < b_l < 1$ , we have

$$\Pi_n[|h_l(x) - h_l(y)|^2] = \tilde{K}(x, x) + \tilde{K}(y, y) - 2\tilde{K}(x, y) \quad (80)$$

$$= \left\| \tilde{K}(x, \cdot) - \tilde{K}(y, \cdot) \right\|_{\tilde{\mathbb{H}}}^2 \quad (81)$$

$$= \sup_{\|\varphi\|_{\tilde{\mathbb{H}}}=1} \left| \left\langle \tilde{K}(x, \cdot) - \tilde{K}(y, \cdot), \varphi \right\rangle \right|^2 \quad (82)$$

$$= \sup_{\|\varphi\|_{\tilde{\mathbb{H}}}=1} |\varphi(x) - \varphi(y)|^2 \quad (83)$$

$$\leq \sup_{\|\varphi\|_{\tilde{\mathbb{H}}}=1} \|\varphi\|_{\mathcal{C}^\nu(\mathcal{V}_l)}^2 \|x - y\|^{2\nu} \quad (84)$$

722 In order to apply Lemma 25, it suffices to show that we have a continuous embedding  $\tilde{\mathbb{H}} \hookrightarrow \mathcal{C}^\nu(\mathcal{V}_l)$ .  
 723  $\tilde{\mathbb{H}}$  is by definition the completion of

$$\left\{ \sum_{i=1}^p \alpha_i \tilde{K}(x_i, \cdot) : p \geq 1, \alpha_i \in \mathbb{R}, x_i \in \mathcal{V}_l \right\} \quad (85)$$

$$= \left\{ \sum_{i=1}^p \alpha_i (\chi_l \circ \phi_l^{-1})(x_i) (\chi_l \circ \phi_l^{-1})(\cdot) K(\phi_l^{-1}(x_i), \phi_l^{-1}(\cdot)) : p \geq 1, \alpha_i \in \mathbb{R}, x_i \in \mathcal{V}_l \right\} \quad (86)$$

724 equipped with the RKHS norm

$$\left\| \sum_{i=1}^p \alpha_i \tilde{K}(x_i, \cdot) \right\|_{\tilde{\mathbb{H}}}^2 = \sum_{i,j=1}^p \alpha_i \alpha_j (\chi_l \circ \phi_l^{-1})(x_i) (\chi_l \circ \phi_l^{-1})(x_j) K(\phi_l^{-1}(x_i), \phi_l^{-1}(x_j)) \quad (87)$$

725 Hence by definition of the Sobolev space  $H^{\nu+d/2}(\mathcal{M})$  and the equality  $\|\cdot\|_{\mathbb{H}} = \|\cdot\|_{H^{\nu+d/2}(\mathcal{M})}$  on  $\mathbb{H}$   
 726 we have

$$\left\| \sum_{i=1}^p \alpha_i \tilde{K}(x_i, \cdot) \right\|_{H^{\nu+d/2}(\mathbb{R}^d)}^2 \quad (88)$$

$$= \left\| \sum_{i=1}^p \alpha_i (\chi_l \circ \phi_l^{-1})(x_i) (\chi_l \circ \phi_l^{-1})(\cdot) K(\phi_l^{-1}(x_i), \phi_l^{-1}(\cdot)) \right\|_{H^{\nu+d/2}(\mathbb{R}^d)}^2 \quad (89)$$

$$\leq \left\| \sum_{i=1}^p \alpha_i (\chi_l \circ \phi_l^{-1})(x_i) K(\phi_l^{-1}(x_i), \cdot) \right\|_{H^{\nu+d/2}(\mathcal{M})}^2 \quad (90)$$

$$= \left\| \sum_{i=1}^p \alpha_i (\chi_l \circ \phi_l^{-1})(x_i) K(\phi_l^{-1}(x_i), \cdot) \right\|_{\mathbb{H}}^2 \quad (91)$$

$$= \sum_{i,j=1}^p \alpha_i \alpha_j (\chi_l \circ \phi_l^{-1})(x_i) (\chi_l \circ \phi_l^{-1})(x_j) K(\phi_l^{-1}(x_i), \phi_l^{-1}(x_j)) \quad (92)$$

$$= \left\| \sum_{i=1}^p \alpha_i \tilde{K}(x_i, \cdot) \right\|_{\tilde{\mathbb{H}}}^2. \quad (93)$$

727 Therefore by completion we find a continuous embedding  $\tilde{\mathbb{H}} \hookrightarrow H^{\nu+d/2}(\mathbb{R}^d)$  with  $\|\cdot\|_{H^{\nu+d/2}(\mathbb{R}^d)} \leq$   
 728  $\|\cdot\|_{\tilde{\mathbb{H}}}$  on  $\tilde{\mathbb{H}}$ . By the Sobolev Embedding Theorem in  $\mathbb{R}^d$ —see for instance Triebel [41], Section 2.7.1,  
 729 Remark 2—we have  $B_{2,2}^{\nu+d/2}(\mathbb{R}^d) = H^{\nu+d/2}(\mathbb{R}^d) \hookrightarrow C^\nu(\mathbb{R}^d)$ , which implies  $\tilde{\mathbb{H}} \hookrightarrow C^\nu(\mathbb{R}^d)$  by  
 730 composition. Therefore there exists a constant  $C = C_\nu$  such that

$$\forall x, y \in \mathcal{V}_l, \Pi_n \left[ |h_l(x) - h_l(y)|^2 \right] \leq C \|x - y\|^{2\nu} \quad (94)$$

731 Hence, by applying Lemma 25 there exists a version  $\tilde{h}_l$  of  $h_l$  with almost surely  $\alpha$ -Hölder continuous  
 732 sample paths for every  $\alpha < \nu$ . Now consider  $\tilde{h} := \sum_{l=1}^L \tilde{h}_l \circ \phi_l$ . Then  $\tilde{h}$  is a version of  $h$  because,  
 733 for all  $a \in \mathcal{U}_l$

$$\Pi \left[ h(a) \neq \tilde{h}(a) \right] = \Pi \left[ \sum_{l=1}^L h_l(\phi_l(a)) \neq \sum_{l=1}^L \tilde{h}_l(\phi_l(a)) \right] \quad (95)$$

$$\leq \Pi \left[ \bigcup_{l=1}^L \left\{ h_l(\phi_l(a)) \neq \tilde{h}_l(\phi_l(a)) \right\} \right] \quad (96)$$

$$\leq \sum_{l=1}^L \Pi \left[ h_l(\phi_l(a)) \neq \tilde{h}_l(\phi_l(a)) \right] \quad (97)$$

$$= 0 \quad (98)$$

734 the last equality being true from the fact the each  $\tilde{h}_l$  is a version of  $h_l$ . Moreover

$$\Pi \left[ \|\tilde{h}\|_{C^\alpha(\mathcal{M})}^2 \right] = \sum_{l=1}^L \Pi \left[ \left\| (\chi_l \tilde{h}) \circ \phi_l^{-1} \right\|_{C^\alpha(\mathbb{R}^d)}^2 \right] \quad (99)$$

$$\lesssim \max_{l=1}^L \Pi \left[ \|h_l\|_{C^\alpha([0,1]^d)}^2 \right] \quad (100)$$

$$\leq C_{C,\alpha,\nu,\mathcal{T}} \quad (101)$$

735 still using Lemma 25 and fact that the  $\chi_l$  and  $\phi_l$  are smooth, hence the additional dependence in  $\mathcal{T}$  in  
 736 the last constant.

We now turn to the general case. The proof will be similar to the one of Ghosal and van der Vaart [17], Proposition I.3 although we need to control the Hölder norms, work through charts and precisely show that the kernel is regular. Assume for simplicity that  $d = 1, 1 < \nu \leq 2$ , otherwise it suffices to introduce coordinates and to proceed by induction on  $\lfloor \nu \rfloor$ . Let  $l \in \{1, \dots, L\}$ , and as before define  $\tilde{K}(x, y) = (\chi_l \circ \phi_l^{-1})(x)(\chi_l \circ \phi_l^{-1})(y)K(\phi_l^{-1}(x), \phi_l^{-1}(y))$  the RKHS of  $h_l = (\chi_l f) \circ \phi_l^{-1}$  as well as  $\tilde{\mathbb{H}}$  its RKHS.

First, let us construct an  $L^2$ -derivative  $\dot{h}_l$  of  $h_l$ —where here  $L^2 = L^2(\Omega, \mathcal{F}, \mathbb{P})$  with  $(\Omega, \mathcal{F}, \mathbb{P})$  the underlying probability space—namely a square integrable process on  $\mathcal{V}_l$  such that

$$\Pi \left[ \left| \frac{h_l(x+h) - h_l(x)}{h} - \dot{h}_l(x) \right|^2 \right] \rightarrow 0 \quad (102)$$

as  $h \rightarrow 0$ , for all  $x \in \mathcal{V}_l$ . For this we will first show that  $\frac{\partial \tilde{K}}{\partial x}(x, \cdot) \in \tilde{\mathbb{H}}$  for every  $x \in \mathcal{V}_l$  and that

$$\left\| \frac{\partial \tilde{K}}{\partial x}(x, \cdot) - \frac{\partial \tilde{K}}{\partial x}(x', \cdot) \right\|_{\tilde{\mathbb{H}}} \leq C_\nu |x - x'|^{\nu-1} \quad (103)$$

We first show that  $\frac{\tilde{K}(x+h, \cdot) - \tilde{K}(x, \cdot)}{h}$  is a Cauchy net in  $\tilde{\mathbb{H}}$ . We have

$$\left\| \frac{\tilde{K}(x+h, \cdot) - \tilde{K}(x, \cdot)}{h} - \frac{\tilde{K}(x+h', \cdot) - \tilde{K}(x, \cdot)}{h'} \right\|_{\tilde{\mathbb{H}}} \quad (104)$$

$$= \sup_{\|\varphi\|_{\tilde{\mathbb{H}}}=1} \left\langle \frac{\tilde{K}(x+h, \cdot) - \tilde{K}(x, \cdot)}{h} - \frac{\tilde{K}(x+h', \cdot) - \tilde{K}(x, \cdot)}{h'}, \varphi \right\rangle_{\tilde{\mathbb{H}}} \quad (105)$$

$$= \sup_{\|\varphi\|_{\tilde{\mathbb{H}}}=1} \frac{\varphi(x+h) - \varphi(x)}{h} - \frac{\varphi(x+h') - \varphi(x)}{h'} \quad (106)$$

$$= \sup_{\|\varphi\|_{\tilde{\mathbb{H}}}=1} \int_0^1 [\varphi'(x+th) - \varphi'(x+th')] dt \quad (107)$$

$$\leq \sup_{\|\varphi\|_{\tilde{\mathbb{H}}}=1} \|\varphi'\|_{C^{\nu-1}(\mathcal{V}_l)} |h - h'|^{\nu-1} \quad (108)$$

$$\leq \sup_{\|\varphi\|_{\tilde{\mathbb{H}}}=1} \|\varphi\|_{C^\nu(\mathcal{V}_l)} |h - h'|^{\nu-1} \quad (109)$$

As in the case  $\nu \leq 1$ , we can show that  $\tilde{\mathbb{H}} \hookrightarrow C^\nu(\mathbb{R}^d)$ . This implies that for a constant  $C = C_\nu$

$$\left\| \frac{\tilde{K}(x+h, \cdot) - \tilde{K}(x, \cdot)}{h} - \frac{\tilde{K}(x+h', \cdot) - \tilde{K}(x, \cdot)}{h'} \right\|_{\tilde{\mathbb{H}}} \leq C |h - h'|^{\nu-1} \quad (110)$$

As  $|h - h'|^{\nu-1} \rightarrow 0$  when  $h, h' \rightarrow 0$ , because  $\nu > 1$ , this proves that  $\frac{\tilde{K}(x+h, \cdot) - \tilde{K}(x, \cdot)}{h}$  is a Cauchy net in  $\tilde{\mathbb{H}}$ : by completeness of  $\tilde{\mathbb{H}}$  it converges in  $\tilde{\mathbb{H}}$  to a limit  $g$ . Since convergence in  $\tilde{\mathbb{H}}$  implies pointwise convergence by the general properties of RKHSs, the limit  $g$  satisfies

$$\forall y, g(y) = \lim_{h \rightarrow 0} \frac{\tilde{K}(x+h, y) - \tilde{K}(x, y)}{h} = \frac{\partial \tilde{K}}{\partial x}(x, y) \quad (111)$$

Hence the partial derivative  $\frac{\partial \tilde{K}}{\partial x}(x, y)$  exists for all  $y$  and  $g = \frac{\partial \tilde{K}}{\partial x}(x, \cdot) \in \tilde{\mathbb{H}}$ . Moreover, by the isometry  $h_l(x) \in L^2 \mapsto \Pi[h_l(x)h_l(\cdot)] = \tilde{K}(x, \cdot) \in \tilde{\mathbb{H}}$ , we deduce that  $h_l$  is actually  $L^2$ -differentiable, with an  $L^2$ -derivative denoted as  $\dot{h}_l$ , and that the derivative process  $\dot{h}_l$  is Gaussian, as it is an  $L^2$  limit of Gaussian random variables, satisfying  $\Pi[\dot{h}_l(x)\dot{h}_l(y)] = \left\langle \frac{\partial \tilde{K}}{\partial x}(x, \cdot), \frac{\partial \tilde{K}}{\partial x}(y, \cdot) \right\rangle_{\tilde{\mathbb{H}}}$ .

Having established the existence of an  $L^2$ -derivative  $\dot{h}_l$  of the process  $h_l$ , we would like now to show that  $\dot{h}_l$  possesses a  $(\gamma - 1)$ -regular version for every  $\gamma < \nu$ . For this, we would like to apply Lemma 25 to  $\dot{h}_l$ .

758 For this notice that, still by isometry, for all  $h > 0$

$$\Pi \left[ \left| \dot{h}_l(x) - \dot{h}_l(y) \right|^2 \right] = \left\| \frac{\partial \tilde{K}}{\partial x}(x', \cdot) - \frac{\partial \tilde{K}}{\partial x}(x, \cdot) \right\|_{\tilde{\mathbb{H}}}^2 \quad (112)$$

$$\leq 3 \left\| \frac{\tilde{K}(x' + h, \cdot) - \tilde{K}(x', \cdot)}{h} - \frac{\partial \tilde{K}}{\partial x}(x', \cdot) \right\|_{\tilde{\mathbb{H}}}^2 \quad (113)$$

$$+ 3 \left\| \frac{\tilde{K}(x + h, \cdot) - \tilde{K}(x, \cdot)}{h} - \frac{\partial \tilde{K}}{\partial x}(x, \cdot) \right\|_{\tilde{\mathbb{H}}}^2 \quad (114)$$

$$+ 3 \left\| \frac{\tilde{K}(x + h, \cdot) - \tilde{K}(x, \cdot)}{h} - \frac{\tilde{K}(x' + h, \cdot) - \tilde{K}(x', \cdot)}{h} \right\|_{\tilde{\mathbb{H}}}^2 \quad (115)$$

759 Therefore by the same arguments as above, we have

$$\Pi \left[ \left| \dot{h}_l(x) - \dot{h}_l(y) \right|^2 \right]^{1/2} = \left\| \frac{\partial \tilde{K}}{\partial x}(x', \cdot) - \frac{\partial \tilde{K}}{\partial x}(x, \cdot) \right\|_{\tilde{\mathbb{H}}} \quad (116)$$

$$\leq \liminf_{h \rightarrow 0} \left\| \frac{\tilde{K}(x + h, \cdot) - \tilde{K}(x, \cdot)}{h} - \frac{\tilde{K}(x' + h, \cdot) - \tilde{K}(x', \cdot)}{h} \right\|_{\tilde{\mathbb{H}}} \quad (117)$$

$$\leq \liminf_{h \rightarrow 0} \sup_{\|\varphi\|_{\tilde{\mathbb{H}}}=1} \int_0^1 |\varphi'(x + th) - \varphi'(x' + th)| dt \quad (118)$$

$$\leq \liminf_{h \rightarrow 0} C_\nu |x - x'|^{\nu-1} \quad (119)$$

$$= C_\nu |x - x'|^{\nu-1} \quad (120)$$

760 Therefore we can now apply Lemma 25 to  $\dot{h}_l$  and find a version  $\tilde{h}'_l$  of  $\dot{h}_l$  with sample paths in  
761  $\mathcal{C}^{\alpha-1}(\mathcal{V}_l)$  almost surely for all  $\alpha < \nu$  and such that

$$\forall \alpha < \nu, \Pi \left[ \left\| \tilde{h}'_l \right\|_{\mathcal{C}^{\alpha-1}(\mathcal{V}_l)}^2 \right] \leq C_{\nu, \alpha} < +\infty \quad (121)$$

762 Take any  $c_l \in (a_l, b_l)$  and consider  $\tilde{h}_l := h_l(c_l) + \int_{c_l}^\cdot \tilde{h}'_l(t) dt$ . Then since  $\tilde{h}'_l$  is almost surely in  
763  $\mathcal{C}^{\alpha-1}(\mathcal{V}_l)$ ,  $\tilde{h}_l$  has almost surely  $\mathcal{C}^\alpha(\mathcal{V}_l)$  sample paths. Moreover, it is easy to check using our  
764 previous results that  $\tilde{h}_l$  has an  $L^2$ -derivative given by  $\tilde{h}'_l$ . This implies that  $\tilde{h}_l$  is a version of  $\dot{h}_l$ :  
765 indeed, for any  $H \in L^2$ , the function  $x \mapsto \Pi \left[ \left( \tilde{h}_l(x) - h_l(x) \right) H \right]$  can be seen to have a vanishing  
766 derivative, and is equal to 0 at  $x = c_l$ , hence  $\Pi \left[ \left( \tilde{h}_l(x) - h_l(x) \right) H \right] = 0$  for every  $H \in L^2$  and  
767  $x \in \mathcal{V}_l$  which implies that for every  $x \in \mathcal{V}_l$   $\tilde{h}_l(x) = h_l(x)$  almost surely.

768 Consider now  $\tilde{h} = \sum_{l=1}^L \tilde{h}_l \circ \phi_l$ . Then, arguing as in the case  $\nu \leq 1$ , we find that  $\tilde{h}$  is a version of  
769  $h$  with  $\mathcal{C}^\alpha(\mathcal{M})$  sample paths for every  $\alpha < \nu$ , and that for every  $\alpha < \nu$  we have  $\Pi \left[ \left\| \tilde{h} \right\|_{\mathcal{C}^\alpha(\mathcal{M})}^2 \right] \leq$   
770  $C_{\alpha, \nu} < +\infty$ .

771 □

772 Using the last result and known properties of the Euclidean Matérn processes, we prove the next  
773 lemma that shows in a way that all of the Matérn processes presented in this paper are sub-Gaussian,  
774 uniformly with respect to the truncation parameter in the case of the truncated intrinsic Matérn  
775 process, and live in Hölder spaces with appropriate exponents. This result will be used to control  
776 Hölder norms when going from the empirical  $L^2$ -norm to the full  $L^2$ -norm. We use the notation  
777  $\Pi_n$  in the next result to emphasize that the prior depends on the sample size when we consider a  
778 truncated intrinsic Matérn process.

779 **Lemma 28.** For  $\Pi_n$  the prior in either Definition 4, Theorem 6 or Definition 7, for every  $\nu > 0$  and  
 780  $\gamma < \nu, \gamma \notin \mathbb{N}$ , there exists a constant  $\sigma(f) = \sigma_\gamma(f)$  independent of  $n$  such that

$$\forall x > 0, \Pi_n \left[ \|f\|_{\mathcal{C}^\gamma(\mathcal{M})} > (x+1)\sigma(f) \right] \leq 2e^{-x^2/2} \quad (122)$$

781 *Proof.* We start by the restriction  $\tilde{f}$  of an extrinsic Matérn process  $\tilde{f}$  to  $\mathcal{M}$ , as in Definition Defini-  
 782 tion 7. By section 3.1 in van der Vaart and van Zanten [47], for every  $\gamma < \nu$  we have  $\tilde{f} \in \mathcal{C}^\gamma([0, 1]^D)$   
 783 almost surely. By lemma I.7 in Ghosal and van der Vaart [17], for every  $\gamma < \nu$   $\tilde{f}$  is a gaussian random  
 784 element in the Banach space  $\mathcal{C}^\gamma([0, 1]^D)$ . In particular, by the Borell-Sudakov-Tsirelson inequality  
 785 (proposition I.8 in Ghosal and van der Vaart [17]) we have :

$$\forall x > 0, \Pi \left[ \left\| \tilde{f} \right\|_{\mathcal{C}^\gamma([0, 1]^D)} > (x+1)\sigma(\tilde{f}) \right] \leq 2e^{-x^2/2} \quad (123)$$

786 where  $\sigma(\tilde{f}) = \Pi \left[ \left\| \tilde{f} \right\|_{\mathcal{C}^\gamma([0, 1]^D)}^2 \right]^{1/2} < \infty$ . Since  $\mathcal{M}$  is smooth, the restriction  $f$  also satisfies

$$\forall x > 0, \Pi \left[ \|f\|_{\mathcal{C}^\gamma(\mathcal{M})} > (x+1)\sigma(f) \right] \leq 2e^{-x^2/2} \quad (124)$$

787 perhaps for a possibly larger constant  $\sigma(f)$ .

788 The case of the intrinsic Matérn process  $f \sim \Pi_n$  truncated at  $J_n \in \mathbb{N} \cup \{\infty\}$  follows in the same  
 789 way, as we have shown in Lemma 27 that  $\sup_{n \geq 1} \Pi_n \left[ \|f\|_{\mathcal{C}^\alpha(\mathcal{M})}^2 \right] \leq C_{\alpha, \nu}$ .  $\square$

790 In order to apply Bernstein's inequality when going from the empirical  $L^2$ -norm to the full  $L^2$ -norm,  
 791 we will also need this following extrapolation lemma.

792 **Lemma 29.** For any function  $g : \mathcal{M} \rightarrow \mathbb{R}$  and  $\gamma \notin \mathbb{N}$  we have

$$\|g\|_\infty \lesssim \|g\|_{\mathcal{C}^\gamma(\mathcal{M})}^{\frac{d}{2\gamma+d}} \|g\|_2^{\frac{2\gamma}{2\gamma+d}} \quad (125)$$

793 *Proof.* We use lemma 15 from van der Vaart and van Zanten [47] and push it through charts. More  
 794 precisely we have, using  $B_{\infty, \infty}^\gamma([0, 1]^D) = \mathcal{C}^\gamma([0, 1]^D)$  for  $\gamma \notin \mathbb{N}$ , that

$$\|g\|_\infty \leq \sum_l \left\| (\chi_l g) \circ \phi_l^{-1} \right\|_{L^\infty(\mathcal{V}_l)} \quad (126)$$

$$\lesssim \max_l \left\| (\chi_l g) \circ \phi_l^{-1} \right\|_{\mathcal{C}^\gamma(\mathcal{V}_l)}^{\frac{d}{2\gamma+d}} \left\| (\chi_l g) \circ \phi_l^{-1} \right\|_{L^2(\mathcal{V}_l)}^{\frac{2\gamma}{2\gamma+d}} \quad (127)$$

795 By definition of the manifold Hölder spaces this gives

$$\|g\|_\infty \lesssim \|g\|_{\mathcal{C}^\gamma(\mathcal{M})}^{\frac{d}{2\gamma+d}} \max_l \left\| (\chi_l g) \circ \phi_l^{-1} \right\|_{L^2(\mathcal{V}_l)}^{\frac{2\gamma}{2\gamma+d}} \quad (128)$$

796 Finally since the  $\chi_l$ 's are bounded, the charts are smooth and  $p_0$  is lower bounded we have

$$\left\| (\chi_l g) \circ \phi_l^{-1} \right\|_{L^2(\mathcal{V}_l)}^2 = \int_{\mathcal{V}_l} |(\chi_l g) \circ \phi_l^{-1}(y)|^2 dy \lesssim \int_{\mathcal{U}_l} g^2(x) p_0(x) \mu(dx) \lesssim \|g\|_2^2 \quad (129)$$

797 which gives the result.  $\square$

798 Having established regularity properties for our prior processes, we now turn to the so-called *small*  
 799 *ball problem*: we want to find sharp lower bounds on  $\Pi[\|f\|_\infty < \varepsilon]$  where  $f \sim \Pi$  is our prior process.  
 800 This will be crucial in order to control the concentration functions. In fact, it is well-known that  
 801 this problem is closely related to the estimation of the metric entropy of the unit ball of the RKHS  
 802 of  $f$  with respect to the uniform norm: see Li and Linde [26] for details. Since we have already  
 803 characterized the RKHS of our processes in Proposition 22 and Lemma 23, we are able to lower  
 804 bound the small-ball probabilities. The technicality here involves getting a bound uniform in the  
 805 truncation parameter for the truncated intrinsic Matérn process, as the truncated Matérn process is a  
 806 sequence of priors rather than a fixed prior.

807 **Lemma 30.** *If  $f \sim \Pi_n$  the prior in either Definition 4 and Theorem 6 or Definition 7 with smoothness*  
 808 *parameter  $\nu > 0$ , then there exist two constants  $C, \varepsilon_0 > 0$  that do not depend on  $n$  such that for all*  
 809  *$\varepsilon \leq \varepsilon_0$  we have  $-\ln \Pi_n[\|f\|_\infty < \varepsilon] \leq C\varepsilon^{-\frac{d}{\nu}}$ .*

810 *Proof.* Because the processes are Gaussian random elements in  $\mathcal{C}(\mathcal{M})$ , their stochastic process  
 811 RKHS given by Proposition 22 coincide with their Gaussian random element RKHS. Hence, for  
 812 the non-truncated intrinsic and the extrinsic Matérn processes the result is a direct application of  
 813 Lemma 19 and Li and Linde [26], Theorem 1.2.

814 For the intrinsic Matérn process truncated at  $J_n$  it is not immediately clear that the constants  $C, \varepsilon_0$   
 815 can be taken independent of  $n$ , and we go through the proof of Li and Linde [26], Proposition 3.1 to  
 816 see this. We first need a crude upper bound of the form

$$-\ln \Pi_n[\|f\|_\infty < \varepsilon] \leq c\varepsilon^{-c} \quad (130)$$

817 for some possibly large constant  $c > 0$ . To get such a bound, we use Castillo et al. [9], Proposition 3  
 818 which shows the existence of a universal constant  $C > 0$  such that

$$\forall \varepsilon \leq \min(1, 4\sigma(f)) \quad -\ln \Pi_n[\|f\|_\infty < \varepsilon] \leq Cn(\varepsilon) \ln \left( \frac{6n(\varepsilon)(1 \vee \sigma(f))}{\varepsilon} \right) \quad (131)$$

819 where  $\sigma(f) = \Pi_n[\|f\|_\infty^2]^{1/2}$  and  $n(\varepsilon)$  is defined in Li and Linde [26] by

$$\max\{j \geq 0 : 4l_j(f) \geq \varepsilon\}, l_j(f) = \inf \left\{ \Pi_n \left[ \left\| \sum_{j \geq 0} Z_j h_j \right\|_\infty^2 \right] : f \stackrel{(d)}{=} \sum_{j \geq 0} Z_j h_j \right\} \quad (132)$$

820 with  $\stackrel{(d)}{=}$  standing for the equality in distributions and the infimum being taken over every possible  
 821 decomposition  $\sum_{j \geq 0} Z_j h_j$  with  $h_j \in \mathcal{C}(\mathcal{M})$ ,  $Z_j$  being a sequence of IID  $N(0, 1)$  random variables  
 822 as in Definition 4, and the series being required to converge uniformly almost surely.

823 The function  $f = \sum_{j=0}^{J_n} \left( \frac{2\nu}{\kappa^2} + \lambda_j \right)^{-\frac{\nu+d/2}{2}} Z_j f_j$  is a valid decomposition. Therefore

$$l_J(f) \leq \Pi_n \left[ \left\| \sum_{j=J}^{J_n} \left( \frac{2\nu}{\kappa^2} + \lambda_j \right)^{-\frac{\nu+d/2}{2}} Z_j f_j \right\|_\infty^2 \right]^{1/2}. \quad (133)$$

824 Still by the Sobolev Embedding Theorem and by Weyl's Law, given in Result 10, for every  $\gamma >$   
 825  $\max(d/2, \nu)$  there exists a constant  $C = C_{\gamma, \mathcal{M}}$  such that for all  $J \in \mathbb{N}$ , allowing  $C$  to change from  
 826 line to line, we have

$$\Pi_n \left[ \left\| \sum_{j=J+1}^{J_n} (1 + \lambda_j)^{-\frac{\nu+d/2}{2}} Z_j f_j \right\|_\infty^2 \right] \leq C^2 \Pi_n \left[ \left\| \sum_{j=J+1}^{J_n} (1 + \lambda_j)^{-\frac{\nu+d/2}{2}} Z_j f_j \right\|_{H^\gamma(\mathcal{M})}^2 \right] \quad (134)$$

$$= C^2 \sum_{j=J+1}^{J_n} (1 + \lambda_j)^{-(\nu+d/2-\gamma)} \quad (135)$$

$$\leq C^2 \sum_{j=J+1}^{J_n} (j+1)^{-(1+2(\nu-\gamma)/d)} \quad (136)$$

$$\leq C^2 \sum_{j>J} (j+1)^{-(1+2(\nu-\gamma)/d)} \quad (137)$$

$$\leq C^2 (J+1)^{-2(\nu-\gamma)/d} \quad (138)$$

827 By choosing  $J = 0$  this gives us  $\sigma(f) \leq C$  independent of  $n$ . Moreover, by choosing  $J \geq$   
 828  $C\varepsilon^{-\frac{d}{2(\nu-\gamma)}}$ , again for a comparison constant  $C$  independent of  $n$ , this gives us  $n(\varepsilon) \leq C\varepsilon^{-\frac{d}{2(\nu-\gamma)}}$   
 829 for  $C$  independent of  $n$ . This implies using Castillo et al. [9], Proposition 3 that

$$-\ln \Pi_n[\|f\|_\infty < \varepsilon] \leq C\varepsilon^{-C} \quad (139)$$

830 for  $C > 0$  independent of  $n$ .

831 With this crude bound we can now continue the proof of Li and Linde [26], Proposition 3.1. For this,  
 832 we need a metric entropy estimate. For this notice that for all  $J \in \mathbb{N} \cup \{\infty\}$  we have  $B_{\mathbb{H}^J}(0, 1) \subset$   
 833  $B_{\mathbb{H}^\infty}(0, 1) = B_{H^{\nu+d/2}(\mathcal{M})}(0, 1)$ , and therefore using Lemma 19 we have the metric entropy estimate

$$\ln N(B_{\mathbb{H}^J}(0, 1)) \leq C\varepsilon^{-\frac{d}{\nu+d/2}} \quad (140)$$

834 for a constant  $C > 0$  independent of  $J$ . Therefore following the proof of proposition 3.1 in Li and  
 835 Linde [26] we find  $-\ln \Pi_n[\|f\|_\infty < \varepsilon] \leq C\varepsilon^{-\frac{d}{\nu}}$  for every  $\varepsilon \leq \varepsilon_0$ , where  $C, \varepsilon_0 > 0$  are constants  
 836 independent of  $n$ .  $\square$

837 This concludes this section and we now turn to the proofs of our main results.

## 838 C Proofs

839 We recall that in the following the expression  $a \lesssim b$  means  $a \leq Cb$  for some constant  $C > 0$  whose  
 840 value is irrelevant for our claims. We first define our notation for Gaussian likelihood and probability  
 841 distribution of the sample.

842 **Definition 31.** For every  $\mathbf{x} \in \mathcal{M}^n$  and  $f : \mathcal{M} \rightarrow \mathbb{R}$  we define  $p_{f,\mathbf{x},\mathbf{y}}$  to be the joint distribution  
 843 corresponding to the marginal  $p_{\mathbf{x}} = p_0$  and conditional  $p_{\mathbf{y}|\mathbf{x}} = \mathcal{N}(f(\mathbf{x}), \sigma_\varepsilon^2 \mathbf{I})$ , where  $f(\mathbf{x})$  is the  
 844 vector with entries  $f(x_i)$ . Expectations with respect to  $p_{f,\mathbf{x},\mathbf{y}}$  we denote by  $\mathbb{E}_{f,\mathbf{x},\mathbf{y}}$  and to  $p_0$  by  $\mathbb{E}_{\mathbf{x}}$ .

845 Following van der Vaart and van Zanten [47], Theorem 1, which is valid for any compact space hence  
 846 also for  $\mathcal{M}$ , we can deduce a posterior contraction rate with respect to the *empirical  $L^2$ -norm*<sup>8</sup>

$$\|f\|_n = \left( \frac{1}{n} \sum_{i=1}^n f(x_i)^2 \right)^{1/2} \quad (141)$$

847 by studying first the so-called *concentration functions* with respect to the uniform norm. This is the  
 848 object of the following lemma. We again recall that the prior  $\Pi_n$  may depend on  $n$  if we consider a  
 849 truncated intrinsic Matérn process.

850 **Theorem 32.** Let  $\Pi_n$  denote the prior in either Theorem 5, Theorem 6 or Theorem 8 with smoothness  
 851 parameter  $\nu$ . Let  $\mathbb{H}_n$  denote the corresponding RKHS. Define the CONCENTRATION FUNCTION for  
 852  $f_0 \in C(\mathcal{M})$  and  $\varepsilon > 0$  by

$$\varphi_{f_0}(\varepsilon) = -\ln \Pi_n[\|f\|_\infty < \varepsilon] + \inf_{f \in \mathbb{H}_n : \|f-f_0\|_\infty < \varepsilon} \|f\|_{\mathbb{H}_n}^2. \quad (142)$$

853 Then if  $f_0 \in H^\beta(\mathcal{M}) \cap B_{\infty,\infty}^\beta(\mathcal{M})$ ,  $\beta > 0$  we have  $\varphi_{f_0}(\varepsilon_n) \leq n\varepsilon_n^2$  for  $\varepsilon_n$  a multiple of  $n^{-\frac{\min(\nu,\beta)}{2\nu+d}}$ .

854 *Proof.* The first term on the right-hand side of Equation (142) is bounded by  $C\varepsilon^{-d/\nu}$  by Lemma 30.  
 855 To bound the second term, we assume, without loss of generality,<sup>9</sup> that  $\nu \geq \beta$ . Consider an  
 856 approximation  $f = \Phi_j(\sqrt{\Delta})f_0$  of  $f_0$ , where  $c\varepsilon \leq 2^{-\beta j} \leq \varepsilon$  and  $c > 0$  is an absolute constant. Since  
 857 we assume  $f_0 \in B_{\infty,\infty}^\beta(\mathcal{M})$ , by definition of  $B_{\infty,\infty}^\beta(\mathcal{M})$  we have

$$\|f_0 - f\|_\infty \leq \|f_0\|_{B_{\infty,\infty}^\beta(\mathcal{M})} 2^{-\beta j} \lesssim \varepsilon \quad (143)$$

858 where in the last inequality the  $B_{\infty,\infty}^\beta(\mathcal{M})$ -norm is the constant implied by notation  $\lesssim$ . We now  
 859 show that

$$\|f\|_{\mathbb{H}}^2 \lesssim \varepsilon^{-\frac{2}{\beta}(\nu-\beta+d/2)} \quad (144)$$

<sup>8</sup>This is actually a seminorm, but we follow the rest of the literature in referring to it as a norm.

<sup>9</sup>Because  $H^\beta(\mathcal{M}) \cap B_{\infty,\infty}^\beta(\mathcal{M}) \subseteq H^{\min(\beta,\nu)}(\mathcal{M}) \cap B_{\infty,\infty}^{\min(\beta,\nu)}(\mathcal{M})$ , if  $\beta > \nu$  then  $f_0 \in H^\beta(\mathcal{M}) \cap B_{\infty,\infty}^\beta \subseteq H^\nu(\mathcal{M}) \cap B_{\infty,\infty}^\nu(\mathcal{M})$  gives a rate of  $n^{-\frac{\nu}{2\nu+d}} = n^{-\frac{\min(\beta,\nu)}{2\nu+d}}$ .

First notice that by Lemma 23 and Proposition 22, for any prior considered here we have  $\mathbb{H} \subseteq H^{\nu+d/2}(\mathcal{M})$  and  $\|\cdot\|_{\mathbb{H}} \leq \|\cdot\|_{H^{\nu+d/2}(\mathcal{M})}$  for a constant  $C$  that does not depend on  $n$ . Hence using Result 10 and properties of  $\Phi$  we have

$$\|f\|_{\mathbb{H}}^2 \lesssim \|f\|_{H^{\nu+d/2}(\mathcal{M})}^2 \quad (145)$$

$$= \sum_{l \geq 0} (1 + \lambda_l)^{\nu+d/2} \Phi^2 \left( 2^{-j} \sqrt{\lambda_l} \right) |\langle f_l, f_0 \rangle|^2 \quad (146)$$

$$\leq \sum_{l: \sqrt{\lambda_l} \leq 2^{j+1}} (1 + \lambda_l)^{\nu+d/2-\beta} (1 + \lambda_l)^\beta |\langle f_l, f_0 \rangle|^2 \quad (147)$$

$$\leq 2^{(j+1)(2\nu-2\beta+d)} \sum_{l: \sqrt{\lambda_l} \leq 2^{j+1}} (1 + \lambda_l)^\beta |\langle f_l, f_0 \rangle|^2 \quad (148)$$

$$\leq 2^{(j+1)(2\nu-2\beta+d)} \sum_{l \geq 0} (1 + \lambda_l)^\beta |\langle f_l, f_0 \rangle|^2 \quad (149)$$

$$= 2^{(j+1)(2\nu-2\beta+d)} \|f_0\|_{H^\beta(\mathcal{M})}^2 \quad (150)$$

$$\leq 2^{2(\nu-\beta+d/2)} c^{-\frac{2}{\beta}(\nu-\beta+d/2)} \|f_0\|_{H^\beta(\mathcal{M})}^2 \varepsilon^{-\frac{2}{\beta}(\nu-\beta+d/2)} \quad (151)$$

Our assumption  $\nu \geq \beta$  implies that

$$\frac{2}{\beta}(\nu - \beta + d/2) \geq \frac{d}{\beta} \geq \frac{d}{\nu}. \quad (152)$$

Hence we have  $\varepsilon^{-d/\nu} \leq \varepsilon^{-\frac{2}{\beta}(\nu-\beta+d/2)}$  which gives us  $\varphi_{f_0}(\varepsilon) \lesssim \varepsilon^{-\frac{2}{\beta}(\nu-\beta+d/2)}$ . It is then easy to check that  $\varepsilon_n = Mn^{-\frac{\beta}{2\nu+d}}$  satisfies  $\varphi_{f_0}(\varepsilon_n) \leq n\varepsilon_n^2$  for  $M > 0$  large enough.  $\square$

From this we deduce an upper bound on the error in the empirical  $L^2$  norm  $\|\cdot\|_n$ , i.e. on the Euclidean distance between the posterior Gaussian process  $f$  and the ground truth function  $f_0$  evaluated at data locations  $x_i$ .

**Lemma 33.** Let  $\Pi_n$  denote the prior in either Theorem 5, Theorem 6 or Theorem 8 with smoothness parameter  $\nu > 0$ . Fix  $f_0 \in H^\beta(\mathcal{M}) \cap B_{\infty,\infty}^\beta(\mathcal{M})$  with  $\beta > 0$ . Then

$$\mathbb{E}_{f \sim \Pi_n(\cdot|\mathbf{x}, \mathbf{y})} \|f - f_0\|_n^q \leq \varepsilon_n^q \quad (153)$$

for all  $q \geq 1$  and  $\varepsilon_n$  a constant multiple of  $n^{-\frac{\min(\nu, \beta)}{2\nu+d}}$  with constant depending on  $f_0, q, \nu$ .

*Proof.* By Theorem 32 for  $\varepsilon_n$  a multiple of  $n^{-\frac{\min(\beta, \nu)}{2\nu+d}}$ , we have  $\varphi_{f_0}(\varepsilon_n) \leq n\varepsilon_n^2$ . By virtue of this, the proof of Theorem 1 and Proposition 11 of van der Vaart and van Zanten [47] imply the result. Indeed, the proof of Theorem 1 relies solely on the fact that  $\varphi_{f_0}(\varepsilon_n/2) \leq n\varepsilon_n^2$  and an application of van der Vaart and van Zanten [47], Proposition 11. We have  $\varphi_{f_0}(\varepsilon_n) \leq n\varepsilon_n^2 \leq n(2\varepsilon_n)^2$  and hence the condition is satisfied with  $\varepsilon_n$  replaced by  $2\varepsilon_n$ . Moreover, even if van der Vaart and van Zanten [47], Theorem 1 is formulated for  $q = 2$ , van der Vaart and van Zanten [47], Proposition 11 gives a result for all  $q \geq 1$ .  $\square$

Notice that for the last result we only assumed  $\nu, \beta > 0$ , and therefore require no constraints on the smoothness parameters. We now turn to the proofs of our main results, Theorems 5, 6 and 8. For them, the extra assumption  $\min(\beta, \nu) > d/2$  is needed in order to go from the empirical  $L^2$  norm to the true  $L^2(p_0)$  norm, leveraging regularity of the ground truth function and the Gaussian process. The value  $d/2$  in this assumption is not surprising, as by the Sobolev embedding theorem this is the minimal natural requirement to guarantee that  $f_0$  and functions in the support of the prior are at least continuous.

*Proof of Theorems 5, 6 and 8.* Given the technical lemmas from Appendix B and Lemma 33, the proof is similar to the one of Theorem 2 in van der Vaart and van Zanten [47]. We include it for completeness and to point out the differences in our context.

889 Take  $\varepsilon_n \propto n^{-\frac{\min(\beta, \nu)}{2\nu+d}}$  satisfying  $\varphi_{f_0}(\varepsilon_n/2) \leq n\varepsilon_n^2$  (such a rate exists by Theorem 32). Then for  
 890 each  $n$  there exists an element  $f_n \in \mathbb{H}_n$ , where this notation refers to the RKHS corresponding to  
 891  $\Pi_n$ , satisfying

$$\|f_n\|_{\mathbb{H}}^2 \leq n\varepsilon_n^2 \quad \|f_n - f_0\|_{\infty} \leq \varepsilon_n/2. \quad (154)$$

892 Hence for any  $\gamma$  such that  $d/2 < \gamma < \nu, \gamma \notin \mathbb{N}$ , any  $s > 0, \tau > 0$  and an indexed family of events  
 893  $\mathcal{A}_r$  that is to be chosen in the future we have

$$\varepsilon_n^{-q} \mathbb{E}_{\mathbf{x}, \mathbf{y}} \mathbb{E}_{f \sim \Pi_n(\cdot | \mathbf{x}, \mathbf{y})} \|f - f_0\|_{L^2(p_0)}^q \lesssim \varepsilon_n^{-q} \mathbb{E}_{\mathbf{x}, \mathbf{y}} \mathbb{E}_{f \sim \Pi_n(\cdot | \mathbf{x}, \mathbf{y})} \|f_n - f_0\|_{L^2(p_0)}^q \quad (155)$$

$$+ \varepsilon_n^{-q} \mathbb{E}_{\mathbf{x}, \mathbf{y}} \mathbb{E}_{f \sim \Pi_n(\cdot | \mathbf{x}, \mathbf{y})} \|f - f_n\|_{L^2(p_0)}^q \quad (156)$$

$$\lesssim 1 + \varepsilon_n^{-q} \mathbb{E}_{\mathbf{x}, \mathbf{y}} \mathbb{E}_{f \sim \Pi_n(\cdot | \mathbf{x}, \mathbf{y})} \|f - f_n\|_{L^2(p_0)}^q \quad (157)$$

$$= 1 + \mathbb{E}_{\mathbf{x}, \mathbf{y}} \int_0^\infty q r^{q-1} \Pi_n(\mathcal{B}(r) | \mathbf{x}, \mathbf{y}) dr \quad (158)$$

894 where the events  $\mathcal{B}(r)$  are defined by  $\mathcal{B}(r) = \{\|f - f_n\|_{L^2(p_0)} > \varepsilon_n r\}$ . Denote

$$\mathcal{B}^{(I)}(r) = \{2\|f - f_n\|_n > \varepsilon_n r\} \quad (159)$$

$$\mathcal{B}^{(II)}(r) = \{\|f\|_{C^\gamma(\mathcal{M})} > \tau \sqrt{n} \varepsilon_n r^s\} \quad (160)$$

$$\mathcal{B}^{(III)}(r) = \{\|f\|_{C^\gamma(\mathcal{M})} \leq \tau \sqrt{n} \varepsilon_n r^s, 2\|f - f_n\|_n \leq \varepsilon_n r < \|f - f_n\|_{L^2(p_0)}\}. \quad (161)$$

895 Then  $\mathcal{B}(r) \subseteq \mathcal{B}^{(I)}(r) \cup \mathcal{B}^{(II)}(r) \cup \mathcal{B}^{(III)}(r)$  and thus

$$\varepsilon_n^{-q} \mathbb{E}_{\mathbf{x}, \mathbf{y}} \mathbb{E}_{f \sim \Pi_n(\cdot | \mathbf{x}, \mathbf{y})} \|f - f_0\|_{L^2(p_0)}^q \lesssim 1 + \mathbb{E}_{\mathbf{x}, \mathbf{y}} \int_0^\infty r^{q-1} \Pi_n(\mathcal{B}^{(I)}(r) | \mathbf{x}, \mathbf{y}) dr \quad (162)$$

$$+ \mathbb{E}_{\mathbf{x}, \mathbf{y}} \int_0^\infty r^{q-1} \mathbb{1}_{\mathcal{A}_r^c} dr \quad (163)$$

$$+ \mathbb{E}_{\mathbf{x}, \mathbf{y}} \int_0^\infty r^{q-1} \mathbb{1}_{\mathcal{A}_r} \Pi_n(\mathcal{B}^{(II)}(r) | \mathbf{x}, \mathbf{y}) dr \quad (164)$$

$$+ \mathbb{E}_{\mathbf{x}, \mathbf{y}} \int_0^\infty r^{q-1} \mathbb{1}_{\mathcal{A}_r} \Pi_n(\mathcal{B}^{(III)}(r) | \mathbf{x}, \mathbf{y}) dr. \quad (165)$$

896 For the first term, by Lemma 33 applied conditionally on the  $x_i$ -values, for which we got a bound on  
 897 the integrated empirical  $L^2$  norm uniformly on the design points, we have

$$\mathbb{E}_{\mathbf{x}, \mathbf{y}} \int_0^\infty r^{q-1} \Pi_n(\mathcal{B}^{(I)}(r) | \mathbf{x}, \mathbf{y}) dr \lesssim \mathbb{E}_{\mathbf{x}, \mathbf{y}} \mathbb{E}_{f \sim \Pi_n(\cdot | \mathbf{x}, \mathbf{y})} \|f - f_0\|_n^q \quad (166)$$

$$\lesssim \mathbb{E}_{\mathbf{x}, \mathbf{y}} \mathbb{E}_{f \sim \Pi_n(\cdot | \mathbf{x}, \mathbf{y})} \|f - f_n\|_n^q + \|f_0 - f_n\|_{\infty}^q \quad (167)$$

$$\lesssim \varepsilon_n^q \quad (168)$$

898 Moreover, by Lemma 14 in van der Vaart and van Zanten [47] applied with  $r$  in the notation of the  
 899 reference being equal to  $\sqrt{n} \varepsilon_n r^s$ , for each  $r > 0$  the event

$$\mathcal{A}_r(\mathbf{x}) = \left\{ \int \frac{p_{\mathbf{y}|\mathbf{x}}^{(f)}(\mathbf{y})}{p_{\mathbf{y}|\mathbf{x}}^{(f_0)}(\mathbf{y})} \Pi_n(d\mathbf{f}) \geq e^{-n\varepsilon_n^2 r^{2s}} \Pi_n(\|f - f_0\|_{\infty} < \varepsilon_n r^s) \right\} \quad (169)$$

900 is such that

$$p_{\mathbf{y}|\mathbf{x}}^{(f_0)}[\mathcal{A}_r^c(\mathbf{x})] \leq e^{-n\varepsilon_n^2 r^{2s}/8} \quad (170)$$

901 Therefore, by Fubini's Theorem, since  $n\varepsilon_n^2 \geq n^{\frac{d}{2\nu+d}} \geq 1$  the second term is bounded by

$$\mathbb{E}_{\mathbf{x}, \mathbf{y}}^{(f_0)} \int_0^\infty r^{q-1} \mathbb{1}_{\mathcal{A}_r^c(\mathbf{x})} dr = \int_0^\infty r^{q-1} \mathbb{E}_{\mathbf{x}} \left[ \mathbb{E}_{\mathbf{y}|\mathbf{x}}^{(f_0)}[\mathcal{A}_r^c(\mathbf{x})] \right] dr \quad (171)$$

$$\leq \int_0^\infty r^{q-1} e^{-n\varepsilon_n^2 r^{2s}/8} dr \quad (172)$$

$$\leq \int_0^\infty r^{q-1} e^{-r^{2s}/8} dr \quad (173)$$

$$\leq C \quad (174)$$

902 where  $C = C_{s,q} < \infty$ . It remains to bound the last two terms. By Bayes' Rule, we have the equality

$$\Pi_n \left[ \|f\|_{\mathcal{C}^\gamma(\mathcal{M})} > \tau \sqrt{n} \varepsilon_n r^s | \mathbf{y} \right] = \frac{\int_{\|f\|_{\mathcal{C}^\gamma(\mathcal{M})} > \tau \sqrt{n} \varepsilon_n r^s} \Pi_{i=1}^n \frac{dp_{f,\mathbf{x}}^{(n)}}{dp_{f_0,\mathbf{x}}^{(n)}} \Pi_n(df)}{\int \Pi_{i=1}^n \frac{dp_{f,\mathbf{x}}^{(n)}}{dp_{f_0,\mathbf{x}}^{(n)}} \Pi_n(df)} \quad (175)$$

903 therefore on  $\mathcal{A}_r(\mathbf{x})$  we have

$$\Pi_n \left[ \|f\|_{\mathcal{C}^\gamma(\mathcal{M})} > \tau \sqrt{n} \varepsilon_n r^s | \mathbf{y} \right] \quad (176)$$

$$\leq \frac{e^{n\varepsilon_n^2 r^{2s}}}{\Pi_n[\|f - f_0\|_\infty < \varepsilon_n r^s]} \int_{\|f\|_{\mathcal{C}^\gamma(\mathcal{M})} > \tau \sqrt{n} \varepsilon_n r^s} \Pi_{i=1}^n \frac{dp_{f,\mathbf{x}}^{(n)}}{dp_{f_0,\mathbf{x}}^{(n)}} \Pi_n(df) \quad (177)$$

904 Hence taking expectation and using Fubini–Tonelli's Theorem gives

$$\mathbb{E}_{\mathbf{x},\mathbf{y}}^{(f_0)} \left[ \mathbb{1}_{\mathcal{A}_r(\mathbf{x})} \Pi_n \left[ \|f\|_{\mathcal{C}^\gamma(\mathcal{M})} > \tau \sqrt{n} \varepsilon_n r^s | \mathbf{y} \right] \right] \quad (178)$$

$$\leq \frac{e^{n\varepsilon_n^2 r^{2s}}}{\Pi_n[\|f - f_0\|_\infty < \varepsilon_n r^s]} \mathbb{E}_{\mathbf{x},\mathbf{y}}^{(f_0)} \left[ \int_{\|f\|_{\mathcal{C}^\gamma(\mathcal{M})} > \tau \sqrt{n} \varepsilon_n r^s} \Pi_{i=1}^n \frac{dp_{f,\mathbf{x}}^{(n)}}{dp_{f_0,\mathbf{x}}^{(n)}} \Pi_n(df) \right] \quad (179)$$

$$= \frac{e^{n\varepsilon_n^2 r^{2s}}}{\Pi_n[\|f - f_0\|_\infty < \varepsilon_n r^s]} \Pi_n \left[ \|f\|_{\mathcal{C}^\gamma(\mathcal{M})} > \tau \sqrt{n} \varepsilon_n r^s \right] \quad (180)$$

905 Therefore the third term can be bounded by

$$\mathbb{E}_{\mathbf{x},\mathbf{y}}^{(f_0)} \int_0^\infty r^{q-1} \mathbb{1}_{\mathcal{A}_r} \Pi_n \left( \mathcal{B}^{(\Pi)}(r) | \mathbf{x}, \mathbf{y} \right) dr \quad (181)$$

$$\leq \int_0^\infty r^{q-1} \frac{e^{n\varepsilon_n^2 r^{2s}}}{\Pi_n[\|f - f_0\|_\infty < \varepsilon_n r^s]} \Pi_n \left[ \|f\|_{\mathcal{C}^\gamma(\mathcal{M})} > \tau \sqrt{n} \varepsilon_n r^s \right] dr \quad (182)$$

906 Now using Lemma 28, for a possibly small constant  $c > 0$  independent of  $n$ , we have

$$\Pi_n \left[ \|f\|_{\mathcal{C}^\gamma(\mathcal{M})} > \tau \sqrt{n} \varepsilon_n r^s | \mathbf{y} \right] \leq e^{-cn\tau^2 \varepsilon_n^2 r^{2s}} \quad (183)$$

907 Moreover, by using the bound on the concentration function in Theorem 32 and Ghosal and van der  
908 Vaart [17], Proposition 11.19, we can assume that

$$\Pi_n[\|f - f_0\|_\infty < \sqrt{n} \varepsilon_n r^s] \geq e^{-c^{-1} n \varepsilon_n^2 r^{2s}}. \quad (184)$$

909 Therefore the third term is bounded by

$$\mathbb{E}_{\mathbf{x},\mathbf{y}}^{(f_0)} \int_0^\infty r^{q-1} \mathbb{1}_{\mathcal{A}_r} \Pi_n \left( \mathcal{B}^{(\Pi)}(r) | \mathbf{x}, \mathbf{y} \right) dr \leq \int_0^\infty r^{q-1} e^{-cn\tau^2 \varepsilon_n^2 r^{2s}} e^{c^{-1} n \varepsilon_n^2 r^{2s}} dr \quad (185)$$

$$\leq \int_0^\infty r^{q-1} e^{-r^{2s}} dr < \infty \quad (186)$$

910 if  $\tau^2 c > 1 + c^{-1} 0$ . It remains to bound the last term.

911 We have by the same arguments as above that

$$\mathbb{E}_{\mathbf{x}, \mathbf{y}} \int_0^\infty r^{q-1} \mathbb{1}_{\mathcal{A}_r} \Pi_n \left( \mathcal{B}^{(\text{III})}(r) \mid \mathbf{x}, \mathbf{y} \right) dr \quad (187)$$

$$= \mathbb{E}_{\mathbf{x}, \mathbf{y}} \int_0^\infty r^{q-1} \mathbb{1}_{\mathcal{A}_r(\mathbf{x})} \quad (188)$$

$$\times \Pi_n \left[ \|f\|_{\mathcal{C}^\gamma(\mathcal{M})} \leq \tau \sqrt{n} \varepsilon_n r^s, 2\|f - f_n\|_n \leq \varepsilon_n r \leq \|f - f_n\|_2 \mid \mathbf{y} \right] dr \quad (189)$$

$$\leq \int_0^\infty r^{q-1} \frac{e^{n\varepsilon_n^2 r^{2s}}}{\Pi_n[\|f - f_0\|_\infty < \varepsilon_n r^s]} \quad (190)$$

$$\times \mathbb{E}_{\mathbf{x}} \Pi_n \left[ \|f\|_{\mathcal{C}^\gamma(\mathcal{M})} \leq \tau \sqrt{n} \varepsilon_n r^s, 2\|f - f_n\|_n \leq \varepsilon_n r \leq \|f - f_n\|_2 \right] dr \quad (191)$$

$$\leq \int_0^\infty r^{q-1} e^{(c+1)n\varepsilon_n^2 r^{2s}} \quad (192)$$

$$\times \int_{\|f\|_{\mathcal{C}^\gamma(\mathcal{M})} \leq \tau \sqrt{n} \varepsilon_n r^s, \varepsilon_n r \leq \|f - f_n\|_2} p_0[\|f - f_n\|_2 \geq 2\|f - f_n\|_n] \Pi_n(df) dr. \quad (193)$$

912 As the squared empirical  $L^2$ -norm is a sample average of the true  $L^2$ -norm, the probability in the  
 913 integrand can be controlled easily via a concentration inequality. As in van der Vaart and van Zanten  
 914 [47], we use Bernstein's inequality—van der Vaart and Wellner [48], Lemma 2.2.9—to find that

$$p_0[\|f - f_n\|_2 \geq 2\|f - f_n\|_n] = p_0 \left[ \|f - f_n\|_n^2 - \|f - f_n\|_2^2 \leq -\frac{3}{4} \|f - f_n\|_n^2 \right] \quad (194)$$

$$\leq \exp \left( -\frac{9n}{16} \frac{\|f - f_n\|_2^2}{\|f - f_n\|_\infty^2} \right) \quad (195)$$

915 Moreover, by Lemma 29, since  $\gamma \notin \mathbb{N}$  we have

$$\|f - f_n\|_\infty \lesssim \|f - f_n\|_{\mathcal{C}^\gamma(\mathcal{M})}^{\frac{d}{2\gamma+d}} \|f - f_n\|_2^{\frac{2\gamma}{2\gamma+d}} \quad (196)$$

916 Using the Sobolev Embedding Theorem—De Vito et al. [13], Theorem 4— $\|f - f_n\|_{\mathcal{C}^\gamma(\mathcal{M})} \lesssim$   
 917  $\|f_n\|_{\mathbb{H}} + \|f\|_{\mathcal{C}^\gamma(\mathcal{M})} \lesssim \tau \sqrt{n} \varepsilon_n r^s$  whenever  $\|f\|_{\mathcal{C}^\gamma(\mathcal{M})} \leq \tau \sqrt{n} \varepsilon_n r^s$ . Therefore, for a constant  $c > 0$   
 918 we have

$$p_0[\|f - f_n\|_2 \geq 2\|f - f_n\|_n] \leq \exp \left( -cn \frac{\|f - f_n\|_2^2}{\|f - f_n\|_{\mathcal{C}^\gamma(\mathcal{M})}^{\frac{2d}{2\gamma+d}} \|f - f_n\|_2^{\frac{4\gamma}{2\gamma+d}}} \right) \quad (197)$$

$$\leq e^{-c\tau^{-\frac{2d}{2\gamma+d}} n^{\frac{2\gamma}{2\gamma+d}} r^{\frac{2d}{2\gamma+d}(1-s)}} \quad (198)$$

919 Hence, we can bound the last term by

$$\mathbb{E}_{\mathbf{x}, \mathbf{y}} \int_0^\infty r^{q-1} \mathbb{1}_{\mathcal{A}_r} \Pi_n \left( \mathcal{B}^{(\text{III})}(r) \mid \mathbf{x}, \mathbf{y} \right) dr \quad (199)$$

$$\leq \int_0^\infty r^{q-1} e^{(c+1)n\varepsilon_n^2 r^{2s}} e^{-c\tau^{-\frac{2d}{2\gamma+d}} n^{\frac{2\gamma}{2\gamma+d}} r^{\frac{2d}{2\gamma+d}(1-s)}} dr. \quad (200)$$

920 We have  $n^{\frac{2\gamma}{2\gamma+d}} = n \left( n^{-\frac{d/2}{2\gamma+d}} \right)^2$ . Since  $\varepsilon_n \lesssim n^{-\frac{\min(\nu, \beta)}{2\nu+d}}$  and  $\min(\nu, \beta) > d/2$ , we have  $n\varepsilon_n^2 \lesssim$   
 921  $n^{\frac{2\gamma}{2\gamma+d}}$  for some  $\gamma \in (d/2, \nu)$ . Moreover, for this choice of  $\gamma$  and  $s$  small enough we have  $\frac{2d}{2\gamma+d}(1-s)$   
 922  $\geq 2s$ , which proves that for some possibly small constant  $C > 0$  the fourth term is bounded by

$$C^{-1} \int_0^\infty r^{q-1} e^{-Cr^{C-1}} dr < \infty \quad (201)$$

923 This concludes the proof.  $\square$

## 924 D Expressions for Pointwise Worst-case Errors

925 Let  $k$  be a kernel on some abstract input domain  $\mathcal{X}$ , and let  $\mathcal{H}_k$  be the respective RKHS. Consider  $n$   
 926 input values  $\mathbf{X} \subseteq \mathcal{X}$  and let  $\sigma_\varepsilon^2 > 0$  be the noise variance. Define

$$m_{k,\mathbf{X},f,\varepsilon}(t) = \mathbf{K}_{t\mathbf{X}}(\mathbf{K}_{\mathbf{X}\mathbf{X}} + \sigma_\varepsilon^2 \mathbf{I})^{-1}(f(\mathbf{X}) + \varepsilon), \quad (202)$$

$$v^{(i)}(t) = v_{k,\mathbf{X}}(t) = k(t, t) - \mathbf{K}_{t\mathbf{X}}(\mathbf{K}_{\mathbf{X}\mathbf{X}} + \sigma_\varepsilon^2 \mathbf{I})^{-1} \mathbf{K}_{\mathbf{X}t}. \quad (203)$$

927 **Proposition 34.** *With notation above*

$$v^{(i)}(t) = \sup_{f \in \mathcal{H}_k, \|f\|_{\mathcal{H}_k} \leq 1} \mathbb{E}_{\varepsilon \sim \mathcal{N}(\mathbf{0}, \sigma_\varepsilon^2 \mathbf{I})} |f(t) - m_{k,\mathbf{X},f,\varepsilon}(t)|^2. \quad (204)$$

928 *Proof.* To simplify notation, we shorten  $\mathbb{E}_{\varepsilon \sim \mathcal{N}(\mathbf{0}, \sigma_\varepsilon^2 \mathbf{I})}$  to  $\mathbb{E}$  and denote  $\boldsymbol{\alpha} = \mathbf{K}_{t\mathbf{X}}(\mathbf{K}_{\mathbf{X}\mathbf{X}} + \sigma_\varepsilon^2 \mathbf{I})^{-1}$ .  
 929 First of all, by direct computation,

$$\mathbb{E} m_{k,\mathbf{X},f,\varepsilon}(t) = \boldsymbol{\alpha} f(\mathbf{X}), \quad (205)$$

$$\mathbb{E} m_{k,\mathbf{X},f,\varepsilon}(t)^2 = \boldsymbol{\alpha} f(\mathbf{X}) f(\mathbf{X})^\top \boldsymbol{\alpha}^\top + \sigma_\varepsilon^2 \boldsymbol{\alpha} \boldsymbol{\alpha}^\top. \quad (206)$$

930 Write

$$\mathbb{E} |f(t) - m_{k,\mathbf{X},f,\varepsilon}(t)|^2 = f(t)^2 - 2f(t) \mathbb{E} m_{k,\mathbf{X},f,\varepsilon}(t) + \mathbb{E} m_{k,\mathbf{X},f,\varepsilon}(t)^2 \quad (207)$$

$$= f(t)^2 - 2f(t) \boldsymbol{\alpha} f(\mathbf{X}) + \boldsymbol{\alpha} f(\mathbf{X}) f(\mathbf{X})^\top \boldsymbol{\alpha}^\top + \sigma_\varepsilon^2 \boldsymbol{\alpha} \boldsymbol{\alpha}^\top \quad (208)$$

$$= (f(t) - \boldsymbol{\alpha} f(\mathbf{X}))^2 + \sigma_\varepsilon^2 \boldsymbol{\alpha} \boldsymbol{\alpha}^\top \quad (209)$$

$$= \left\langle k(t, \cdot) - \sum_{j=1}^n \alpha_j k(x_j, \cdot), f \right\rangle_{\mathcal{H}_k}^2 + \sigma_\varepsilon^2 \boldsymbol{\alpha} \boldsymbol{\alpha}^\top. \quad (210)$$

931 As  $\|g\|_{\mathcal{H}_k} = \sup_{f \in \mathcal{H}_k, \|f\|_{\mathcal{H}_k} \leq 1} \langle g, f \rangle_{\mathcal{H}_k}$ , implying  $\sup_{f \in \mathcal{H}_k, \|f\|_{\mathcal{H}_k} \leq 1} \langle g, f \rangle_{\mathcal{H}_k}^2 = \|g\|_{\mathcal{H}_k}^2$ , we have

$$\sup_{\substack{f \in \mathcal{H}_k \\ \|f\|_{\mathcal{H}_k} \leq 1}} \mathbb{E} |f(t) - m_{k,\mathbf{X},f,\varepsilon}(t)|^2 = \left\| k(t, \cdot) - \sum_{j=1}^n \alpha_j k(x_j, \cdot) \right\|_{\mathcal{H}_k}^2 + \sigma_\varepsilon^2 \boldsymbol{\alpha} \boldsymbol{\alpha}^\top \quad (211)$$

$$= k(t, t) - 2\boldsymbol{\alpha} \mathbf{K}_{\mathbf{X}t} + \underbrace{\boldsymbol{\alpha} \mathbf{K}_{\mathbf{X}\mathbf{X}} \boldsymbol{\alpha}^\top + \sigma_\varepsilon^2 \boldsymbol{\alpha} \boldsymbol{\alpha}^\top}_{\boldsymbol{\alpha} \mathbf{K}_{\mathbf{X}t}} \quad (212)$$

$$= k(t, t) - \boldsymbol{\alpha} \mathbf{K}_{\mathbf{X}t} = \underbrace{k(t, t) - \mathbf{K}_{t\mathbf{X}}(\mathbf{K}_{\mathbf{X}\mathbf{X}} + \sigma_\varepsilon^2 \mathbf{I})^{-1} \mathbf{K}_{\mathbf{X}t}}_{v_{k,\mathbf{X}}(t)}. \quad (213)$$

932  $\square$

933 We now move to the misspecified case. Consider the RKHS  $\mathcal{H}_c$  for some other kernel  $c : \mathcal{X} \times \mathcal{X} \rightarrow \mathbb{R}$   
 934 instead of  $\mathcal{H}_k$ . Then, continuing from (210), write

$$\sup_{\substack{f \in \mathcal{H}_c \\ \|f\|_{\mathcal{H}_c} \leq 1}} \mathbb{E} |f(t) - m_{k,\mathbf{X},f,\varepsilon}(t)|^2 = \left\| c(t, \cdot) - \sum_{j=1}^n \alpha_j c(x_j, \cdot) \right\|_{\mathcal{H}_c}^2 + \sigma_\varepsilon^2 \boldsymbol{\alpha} \boldsymbol{\alpha}^\top. \quad (214)$$

935 The question is how to compute the norm on the right-hand side. There is not much hope of  
 936 doing this exactly in the misspecified case, thus we consider approximations. To this end, we  
 937 take some large set of locations  $\mathbf{X}' \subseteq \mathcal{X}$ . Then we use  $\|g\|_{\mathcal{H}_c}^2 \approx g(\mathbf{X}')^\top \mathbf{C}_{\mathbf{X}'\mathbf{X}'}^{-1} g(\mathbf{X}')$  for  $g(\cdot) =$   
 938  $c(t, \cdot) - \sum_{j=1}^n \alpha_j c(x_j, \cdot)$ . As a result,

$$\sup_{\substack{f \in \mathcal{H}_c \\ \|f\|_{\mathcal{H}_c} \leq 1}} \mathbb{E} |f(t) - m_{k,\mathbf{X},f,\varepsilon}(t)|^2 \approx g(\mathbf{X}')^\top \mathbf{C}_{\mathbf{X}'\mathbf{X}'}^{-1} g(\mathbf{X}') + \sigma_\varepsilon^2 \boldsymbol{\alpha} \boldsymbol{\alpha}^\top = \tilde{v}_{k,c,\mathbf{X}}(t) = v^{(e)}(t) \quad (215)$$

939 where  $v^{(e)}(t)$  was first introduced in Section 4

940 To compute spatial averages of this quantity, let  $g_t(\cdot) = c(t, \cdot) - \sum_{j=1}^n \alpha_j c(x_j, \cdot)$ , the same as  $g$   
 941 before, but now with explicit dependence on  $t$ . Similarly, put  $\alpha_t = \mathbf{K}_{t\mathbf{X}}(\mathbf{K}_{\mathbf{X}\mathbf{X}} + \sigma_\varepsilon^2 \mathbf{I})^{-1}$ . Then

$$g_t(\mathbf{X}') = \mathbf{C}_{\mathbf{X}'t} - \mathbf{C}_{\mathbf{X}'\mathbf{X}}\alpha_t^\top = \mathbf{C}_{\mathbf{X}'t} - \mathbf{C}_{\mathbf{X}'\mathbf{X}}(\mathbf{K}_{\mathbf{X}\mathbf{X}} + \sigma_\varepsilon^2 \mathbf{I})^{-1}\mathbf{K}_{\mathbf{X}t} \quad (216)$$

$$g_t(\mathbf{X}')^\top \mathbf{C}_{\mathbf{X}'\mathbf{X}'}^{-1} g_t(\mathbf{X}') = (\mathbf{C}_{t\mathbf{X}'} - \alpha_t \mathbf{C}_{\mathbf{X}\mathbf{X}'})(\mathbf{C}_{\mathbf{X}'\mathbf{X}'}^{-1}(\mathbf{C}_{\mathbf{X}'t} - \mathbf{C}_{\mathbf{X}'\mathbf{X}}\alpha_t^\top)). \quad (217)$$

942 From here we can also deduce that

$$\frac{1}{|\mathbf{X}'|} \sum_{t \in \mathbf{X}'} \tilde{v}_{k,c,\mathbf{X}}(t) = \frac{1}{|\mathbf{X}'|} \sum_{t \in \mathbf{X}'} g_t(\mathbf{X}')^\top \mathbf{C}_{\mathbf{X}'\mathbf{X}'}^{-1} g_t(\mathbf{X}') \quad (218)$$

$$= \frac{1}{|\mathbf{X}'|} \text{tr}(g_{\mathbf{X}'}(\mathbf{X}')^\top \mathbf{C}_{\mathbf{X}'\mathbf{X}'}^{-1} g_{\mathbf{X}'}(\mathbf{X}')) \quad (219)$$

943 where  $g_{\mathbf{X}'}(\mathbf{X}') = \mathbf{C}_{\mathbf{X}'\mathbf{X}'} - \mathbf{C}_{\mathbf{X}'\mathbf{X}}(\mathbf{K}_{\mathbf{X}\mathbf{X}} + \sigma_\varepsilon^2 \mathbf{I})^{-1}\mathbf{K}_{\mathbf{X}\mathbf{X}'}$ .

## 944 E Full Experimental Details

945 All of our kernels were computed using GPJAX [32] and the GEOMETRIC KERNELS library. We  
 946 use three manifolds, each represented by a mesh: (i) a dumbbell-shaped manifold represented as a  
 947 mesh with 1556 nodes, (ii) a sphere represented by an icosahedral mesh with 2562 nodes, and (iii)  
 948 the Stanford dragon mesh, preprocessed to keep only its largest connected component, which has  
 949 100179 nodes. For the sphere, we also considered a finer icosahedral mesh with 10242, but this was  
 950 found to have virtually no effect on the computed pointwise expected errors.

951 We use extrinsic Matérn and Riemannian Matérn kernels with the following hyperparameters:  $\sigma_f^2 = 1$   
 952 and  $\sigma_\varepsilon^2 = 0.0005$ . For the truncated Karhunen–Loève expansion, we used  $J = 500$  eigenpairs  
 953 obtained from the mesh. We selected smoothness values to ensure norm-equivalence of the intrinsic  
 954 and extrinsic kernels’ reproducing kernel Hilbert spaces, which was  $\nu = 5/2$  for the intrinsic model,  
 955 and  $\nu = 5/2 + d/2$  for the extrinsic model, where  $d$  is the manifold’s dimension. We used different  
 956 length scales for each manifold:  $\kappa = 200$  for the dumbbell,  $\kappa = 0.25$  for the sphere, and  $\kappa = 0.05$   
 957 for the dragon, selected to ensure that the Gaussian processes were neither approximately constant,  
 958 nor white-noise-like. We considered data sizes of  $N = 50$ ,  $N = 500$ , and  $N = 1000$ , respectively,  
 959 for the dumbbell, sphere, and dragon, sampled uniformly from the mesh’s nodes, which in each case  
 960 resulted in a reasonably-uniform distribution of points across the manifold. Finally, for the extrinsic  
 961 pointwise error approximation, we used a subset  $\mathbf{X}'$  uniformly sampled from each mesh’s nodes, of  
 962 size equal to the data size. For each respective test set, we used the full mesh. Each experiment was  
 963 repeated for 10 different seeds.

964 To set the length scales for the extrinsic process, we used maximum marginal likelihood optimization  
 965 on the full data, except for the dumbbell whose full data size is small and for which we instead  
 966 generated a larger set consisting of 500 points. We optimized only the length scale, leaving all other  
 967 hyperparameters fixed. We used ADAM with a learning rate of 0.005, and an initialization equal to  
 968 the length scale  $\kappa$  of the intrinsic model, except for the dumbbell where this lead to divergence and  
 969 we instead used an initial value of  $\kappa/4$ . We ran the optimizer for a total of 1000 steps. With these  
 970 settings, we found empirically that maximum marginal likelihood optimization always converged.

## 971 References

- 972 [1] J. Arbel, G. Gayraud, and J. Rousseau. Bayesian Optimal Adaptive Estimation Using a Sieve  
 973 Prior. *Scandinavian Journal of Statistics*, 40(3):549–570, 2013. Cited on page 6.
- 974 [2] I. Azangulov, A. Smolensky, A. Terenin, and V. Borovitskiy. Stationary Kernels and  
 975 Gaussian Processes on Lie Groups and their Homogeneous Spaces I: the Compact Case.  
 976 *arXiv:2208.14960*, 2022. Cited on page 1.
- 977 [3] I. Azangulov, A. Smolensky, A. Terenin, and V. Borovitskiy. Stationary Kernels and Gaussian  
 978 Processes on Lie Groups and their Homogeneous Spaces II: non-compact symmetric spaces.  
 979 *arXiv:2301.13088*, 2023. Cited on page 1.
- 980 [4] C. Berenfeld, P. Rosa, and J. Rousseau. Estimating a density near an unknown manifold: a  
 981 Bayesian nonparametric approach. *arXiv:2205.15717*, 2022. Cited on page 4.

- 982 [5] A. Bhattacharya and D. B. Dunson. Nonparametric Bayesian density estimation on manifolds  
983 with applications to planar shapes. *Biometrika*, 97 4:851–865, 2010. Cited on page 4.
- 984 [6] V. Borovitskiy, I. Azangulov, A. Terenin, P. Mostowsky, M. Deisenroth, and N. Durrande.  
985 Matérn Gaussian processes on graphs. In *International Conference on Artificial Intelligence  
986 and Statistics*, pages 2593–2601. PMLR, 2021. Cited on page 1.
- 987 [7] V. Borovitskiy, M. R. Karimi, V. R. Somnath, and A. Krause. Isotropic Gaussian Processes on  
988 Finite Spaces of Graphs. In *International Conference on Artificial Intelligence and Statistics*,  
989 pages 4556–4574. PMLR, 2023. Cited on page 1.
- 990 [8] V. Borovitskiy, A. Terenin, P. Mostowsky, et al. Matérn Gaussian processes on Riemannian  
991 manifolds. *Advances in Neural Information Processing Systems*, 33:12426–12437, 2020. Cited  
992 on pages 1, 2, 5, 14, 18.
- 993 [9] I. Castillo, G. Kerkycharian, and D. Picard. Thomas Bayes’ walk on manifolds. *Probability  
994 Theory and Related Fields*, 2013. Cited on pages 4, 14, 17, 26.
- 995 [10] I. Chavel. *Eigenvalues in Riemannian Geometry*. Elsevier, 1984. Cited on pages 2, 13.
- 996 [11] T. Coulhon, G. Kerkycharian, and P. Petrushev. Heat Kernel Generated frames in the setting  
997 of Dirichlet Spaces. *Journal of Fourier Analysis and Applications*, 2012. Cited on pages 4, 14,  
998 17.
- 999 [12] S. Coveney, C. Corrado, C. H. Roney, D. O’Hare, S. E. Williams, M. D. O’Neill, S. A. Niederer,  
1000 R. H. Clayton, J. E. Oakley, and R. D. Wilkinson. Gaussian Process Manifold Interpolation  
1001 for Probabilistic Atrial Activation Maps and Uncertain Conduction Velocity. *Philosophical  
1002 Transactions of the Royal Society A*, 378(2173):20190345, 2020. Cited on page 1.
- 1003 [13] E. De Vito, N. Mücke, and L. Rosasco. Reproducing kernel Hilbert spaces on manifolds:  
1004 Sobolev and Diffusion spaces. *Analysis and Applications*, 2021. Cited on pages 6, 13, 15, 17,  
1005 21, 31.
- 1006 [14] D. B. Dunson, H.-T. Wu, and N. Wu. Graph Based Gaussian Processes on Restricted Domains.  
1007 *Journal of the Royal Statistical Society Series B: Statistical Methodology*, 2021. Cited on  
1008 page 4.
- 1009 [15] C. Fefferman, S. Mitter, and H. Narayanan. Testing the Manifold Hypothesis. *Journal of the  
1010 American Mathematical Society*, 2016. Cited on page 2.
- 1011 [16] S. Ghosal, J. K. Ghosh, and A. W. van der Vaart. Convergence Rates of Posterior Distributions.  
1012 *The Annals of Statistics*, 28(2):500–531, 2000. Cited on page 4.
- 1013 [17] S. Ghosal and A. van der Vaart. *Fundamentals of Nonparametric Bayesian Inference*. Cam-  
1014 bridge Series in Statistical and Probabilistic Mathematics. Cambridge University Press, 2017.  
1015 Cited on pages 3–6, 16, 23, 25, 30.
- 1016 [18] E. Giné and R. Nickl. *Mathematical Foundations of Infinite-Dimensional Statistical Models*.  
1017 Cambridge Series in Statistical and Probabilistic Mathematics. Cambridge University Press,  
1018 2015. Cited on pages 13, 14, 17.
- 1019 [19] I. S. Gradshteyn and I. M. Ryzhik. *Table of Integrals, Series, and Products*. Academic Press,  
1020 7th edition, 2014. Cited on page 7.
- 1021 [20] A. Grigor’yan. *Heat Kernel and Analysis on Manifolds*. AMS and International Press of  
1022 Boston, 2009. Cited on page 13.
- 1023 [21] N. Große and C. Schneider. Sobolev spaces on Riemannian manifolds with bounded geometry:  
1024 General coordinates and traces. *Mathematische Nachrichten*, 2013. Cited on pages 7, 13, 16,  
1025 17.
- 1026 [22] N. Jaquier, V. Borovitskiy, A. Smolensky, A. Terenin, T. Asfour, and L. Rozo. Geometry-aware  
1027 bayesian optimization in robotics using riemannian matérn kernels. In *Conference on Robot  
1028 Learning*, pages 794–805. PMLR, 2022. Cited on page 1.
- 1029 [23] M. Kanagawa, P. Hennig, D. Sejdinovic, and B. K. Sriperumbudur. Gaussian processes and  
1030 kernel methods: A review on connections and equivalences. *arXiv:1807.02582*, 2018. Cited on  
1031 pages 18, 21.
- 1032 [24] L. LeCam. Convergence of Estimates Under Dimensionality Restrictions. *The Annals of  
1033 Statistics*, 1(1):38–53, 1973. Cited on page 4.
- 1034 [25] D. Li, W. Tang, and S. Banerjee. Inference for Gaussian Processes with Matern Covariogram  
1035 on Compact Riemannian Manifolds. *Journal of Machine Learning Research*, 24(101):1–26,  
1036 2023. Cited on page 4.

- [26] W. V. Li and W. Linde. Approximation, Metric Entropy and Small Ball Estimates for Gaussian Measures. *The Annals of Probability*, 27(3):1556–1578, 1999. Cited on pages 25–27.
- [27] M. Lifshits. *Lectures on Gaussian processes*. Springer, 2012. Cited on page 16.
- [28] F. Lindgren, H. Rue, and J. Lindström. An explicit link between Gaussian fields and Gaussian Markov random fields: the stochastic partial differential equation approach. *Journal of the Royal Statistical Society: Series B (Statistical Methodology)*, 73(4):423–498, 2011. Cited on page 5.
- [29] M. Mutny and A. Krause. Experimental design for linear functionals in reproducing kernel hilbert spaces. *Advances in Neural Information Processing Systems*, 35:20175–20188, 2022. Cited on page 8.
- [30] Z. Naulet and É. Barat. Some Aspects of Symmetric Gamma Process Mixtures. *Bayesian Analysis*, 13(3):703–720, 2018. Cited on page 4.
- [31] M. Niu, P. Cheung, L. Lin, Z. Dai, N. D. Lawrence, and D. B. Dunson. Intrinsic Gaussian processes on complex constrained domains. *Journal of the Royal Statistical Society: Series B (Statistical Methodology)*, 81, 2018. Cited on page 1.
- [32] T. Pinder and D. Dodd. GPJax: A Gaussian Process Framework in JAX. *Journal of Open Source Software*, 2022. Cited on page 33.
- [33] A. Rahimi and B. Recht. Random Features for Large-Scale Kernel Machines. *Advances in neural information processing systems*, 20, 2007. Cited on page 6.
- [34] C. E. Rasmussen and C. K. I. Williams. *Gaussian Processes for Machine Learning*. Adaptive Computation and Machine Learning. MIT Press, Cambridge, Mass, 2006. Cited on page 3.
- [35] J. Rousseau. On the frequentist properties of Bayesian nonparametric methods. *Annual Review of Statistics and Its Application*, 3:211–231, 2016. Cited on pages 3, 4.
- [36] J. Rousseau and B. Szabo. Asymptotic behaviour of the empirical Bayes posteriors associated to maximum marginal likelihood estimator. *The Annals of Statistics*, 45(2):833–865, 2017. Cited on pages 4, 6.
- [37] J.-B. Salomond. Testing Un-Separated Hypotheses by Estimating a Distance. *Bayesian Analysis*, 13(2):461–484, 2018. Cited on page 4.
- [38] D. Sanz-Alonso and R. Yang. Unlabeled Data Help in Graph-Based Semi-Supervised Learning: A Bayesian Nonparametrics Perspective. *Journal of Machine Learning Research*, 23(97):1–28, 2022. Cited on page 4.
- [39] L. Schwartz. On Bayes procedures. *Zeitschrift für Wahrscheinlichkeitstheorie und Verwandte Gebiete*, 4:10–26, 1965. Cited on page 4.
- [40] R. S. Strichartz. Analysis of the Laplacian on the complete Riemannian manifold. *Journal of functional analysis*, 52(1):48–79, 1983. Cited on page 13.
- [41] H. Triebel. *Theory of Function Spaces I*. Birkhäuser, 1983. Cited on pages 14, 22.
- [42] H. Triebel. *Theory of Function Spaces II*. Birkhäuser, 1992. Cited on pages 13, 14.
- [43] A. B. Tsybakov. *Introduction to Nonparametric Estimation*. Springer Publishing Company, Incorporated, 1st edition, 2008. Cited on pages 4, 7.
- [44] F. van der Meulen, M. Schauer, and H. van Zanten. Reversible jump MCMC for nonparametric drift estimation for diffusion processes. *Computational Statistics and Data Analysis*, 71:615–632, 2014. Cited on page 6.
- [45] A. W. van der Vaart and J. H. van Zanten. Adaptive Bayesian estimation using a Gaussian random field with inverse Gamma bandwidth. *The Annals of Statistics*, 37(5B):2655–2675, 2009. Cited on page 4.
- [46] A. W. van der Vaart and J. H. van Zanten. Rates of contraction of posterior distributions based on Gaussian process priors. *The Annals of Statistics*, 36(3), 2008. Cited on pages 4, 5, 16.
- [47] A. van der Vaart and H. van Zanten. Information Rates of Nonparametric Gaussian Process Methods. *Journal of Machine Learning Research*, 12(60):2095–2119, 2011. Cited on pages 2–5, 19, 25, 27–29, 31.
- [48] A. van der Vaart and J. Wellner. *Weak Convergence and Empirical Processes*. Springer Series in Statistics. Springer Verlag, 1996. Cited on page 31.
- [49] H. van Zanten and A. van der Vaart. Reproducing kernel Hilbert spaces of Gaussian priors. *Institute of Mathematical Statistics Collections*, 2008. Cited on pages 15, 19.

- 1091 [50] X. Wang and G. Lerman. Nonparametric Bayesian regression on manifolds via Brownian  
1092 motion. *arXiv:1507.06710*, 2015. Cited on page 4.
- 1093 [51] H. Wendland. *Scattered Data Approximation*. Cambridge University Press, 2004. Cited on  
1094 pages 7, 18.
- 1095 [52] P. Whittle. Stochastic Processes in Several Dimensions. *Bulletin of the International Statistical*  
1096 *Institute*, 40(2):974–994, 1963. Cited on page 5.
- 1097 [53] Y. Yang and D. B. Dunson. Bayesian manifold regression. *The Annals of Statistics*, 44(2):876–  
1098 905, 2016. Cited on pages 4, 6–8, 17.
- 1099 [54] W. W. Yoo, V. Rivoirard, and J. Rousseau. Adaptive supremum norm posterior contraction:  
1100 Wavelet spike-and-slab and anisotropic Besov spaces. *arXiv:1708.01909*, 2017. Cited on  
1101 page 6.
